# Supplementary material
Source: MDPI journal article supplement (https://www.mdpi.com/2071-1050/14/17/10728)
Supplement: s1 [file s1]

Table S1 General vaccination status by sex

| 1. Have you received the COVID-19 vaccine?* sex Crosstabulation |     |              |        |        |        |        |
|-----------------------------------------------------------------|-----|--------------|--------|--------|--------|--------|
|                                                                 |     |              | sex    |        |        | Total  |
|                                                                 |     |              |        | male   | female |        |
| 1. Have you received the COVID-19 vaccine?                      |     | Count        | 3      | 1      | 1      | 5      |
|                                                                 |     | % within sex | 100.0% | 0.6%   | 0.3%   | 1.0%   |
|                                                                 | yes | Count        | 0      | 105    | 165    | 270    |
|                                                                 |     | % within sex | 0.0%   | 61.8%  | 50.3%  | 53.9%  |
|                                                                 | no  | Count        | 0      | 64     | 162    | 226    |
|                                                                 |     | % within sex | 0.0%   | 37.6%  | 49.4%  | 45.1%  |
| Total                                                           |     | Count        | 3      | 170    | 328    | 501    |
|                                                                 |     | % within sex | 100.0% | 100.0% | 100.0% | 100.0% |

Table S2

| Chi-Square Tests   |                            |    |                                   |
|--------------------|----------------------------|----|-----------------------------------|
|                    | Value                      | df | Asymptotic Significance (2-sided) |
| Pearson Chi-Square | <b>305.634<sup>a</sup></b> | 4  | <b>.000</b>                       |
| Likelihood Ratio   | 36.339                     | 4  | .000                              |
| N of Valid Cases   | 501                        |    |                                   |

a. 5 cells (55.6%) have expected count less than 5. The minimum expected count is .03.

Table S3

| Symmetric Measures |            |             |                          |
|--------------------|------------|-------------|--------------------------|
|                    |            | Value       | Approximate Significance |
| Nominal by Nominal | Phi        | <b>.781</b> | .000                     |
|                    | Cramer's V | .552        | .000                     |
| N of Valid Cases   |            | 501         |                          |

Table S4 Second vaccine status by sex

| 2. If your answer to the previous question was positive, have you received both scheduled doses of the vaccine?* sex Crosstabulation |     |              |        |        |        |        |
|--------------------------------------------------------------------------------------------------------------------------------------|-----|--------------|--------|--------|--------|--------|
|                                                                                                                                      |     |              | sex    |        |        | Total  |
|                                                                                                                                      |     |              |        | male   | female |        |
| 2. If your answer to the previous question was positive, have you received both scheduled doses of the vaccine?                      |     | Count        | 3      | 42     | 106    | 151    |
|                                                                                                                                      |     | % within sex | 100.0% | 24.7%  | 32.3%  | 30.1%  |
|                                                                                                                                      | yes | Count        | 0      | 105    | 164    | 269    |
|                                                                                                                                      |     | % within sex | 0.0%   | 61.8%  | 50.0%  | 53.7%  |
|                                                                                                                                      | no  | Count        | 0      | 23     | 58     | 81     |
|                                                                                                                                      |     | % within sex | 0.0%   | 13.5%  | 17.7%  | 16.2%  |
| Total                                                                                                                                |     | Count        | 3      | 170    | 328    | 501    |
|                                                                                                                                      |     | % within sex | 100.0% | 100.0% | 100.0% | 100.0% |

Table S5

| Chi-Square Tests   |                           |    |                                   |
|--------------------|---------------------------|----|-----------------------------------|
|                    | Value                     | df | Asymptotic Significance (2-sided) |
| Pearson Chi-Square | <b>13.229<sup>a</sup></b> | 4  | <b>.010</b>                       |
| Likelihood Ratio   | 13.522                    | 4  | .009                              |
| N of Valid Cases   | 501                       |    |                                   |

a. 3 cells (33.3%) have expected count less than 5. The minimum expected count is .49.

Table S6

| Symmetric Measures |            |             |                          |
|--------------------|------------|-------------|--------------------------|
|                    |            | Value       | Approximate Significance |
| Nominal by Nominal | Phi        | <b>.162</b> | .010                     |
|                    | Cramer's V | .115        | .010                     |
| N of Valid Cases   |            | 501         |                          |

Table S7 Third vaccine status by sex

| 4. Are you planning to receive the third dose of the COVID-19 vaccine?* sex Crosstabulation |     |              |        |        |        |        |
|---------------------------------------------------------------------------------------------|-----|--------------|--------|--------|--------|--------|
|                                                                                             |     |              | sex    |        |        | Total  |
|                                                                                             |     |              |        | male   | female |        |
| 4. Are you planning to receive the third dose of the COVID-19 vaccine?                      |     | Count        | 3      | 40     | 106    | 149    |
|                                                                                             |     | % within sex | 100.0% | 23.5%  | 32.3%  | 29.7%  |
|                                                                                             | yes | Count        | 0      | 80     | 117    | 197    |
|                                                                                             |     | % within sex | 0.0%   | 47.1%  | 35.7%  | 39.3%  |
|                                                                                             | no  | Count        | 0      | 50     | 105    | 155    |
|                                                                                             |     | % within sex | 0.0%   | 29.4%  | 32.0%  | 30.9%  |
| Total                                                                                       |     | Count        | 3      | 170    | 328    | 501    |
|                                                                                             |     | % within sex | 100.0% | 100.0% | 100.0% | 100.0% |

Table S8

| Chi-Square Tests                                                                       |                           |    |                                   |
|----------------------------------------------------------------------------------------|---------------------------|----|-----------------------------------|
|                                                                                        | Value                     | df | Asymptotic Significance (2-sided) |
| Pearson Chi-Square                                                                     | <b>13.975<sup>a</sup></b> | 4  | <b>.007</b>                       |
| Likelihood Ratio                                                                       | 14.197                    | 4  | .007                              |
| N of Valid Cases                                                                       | 501                       |    |                                   |
| a. 3 cells (33.3%) have expected count less than 5. The minimum expected count is .89. |                           |    |                                   |

Table S9

| Symmetric Measures |            |             |                          |
|--------------------|------------|-------------|--------------------------|
|                    |            | Value       | Approximate Significance |
| Nominal by Nominal | Phi        | <b>.167</b> | .007                     |
|                    | Cramer's V | .118        | .007                     |
| N of Valid Cases   |            | 501         |                          |

Table S10 Status of future vaccination by sex (unvaccinated group)

| 6. If you have not been vaccinated, are you planning to receive the COVID-19 vaccine?* sex Crosstabulation |                   |              |        |        |        |        |
|------------------------------------------------------------------------------------------------------------|-------------------|--------------|--------|--------|--------|--------|
|                                                                                                            |                   |              | sex    |        |        | Total  |
|                                                                                                            |                   |              |        | male   | female |        |
| 6. If you have not been vaccinated, are you planning to receive the COVID-19 vaccine?                      |                   | Count        | 3      | 98     | 157    | 258    |
|                                                                                                            |                   | % within sex | 100.0% | 57.6%  | 47.9%  | 51.5%  |
|                                                                                                            | a) definitely yes | Count        | 0      | 5      | 8      | 13     |
|                                                                                                            |                   | % within sex | 0.0%   | 2.9%   | 2.4%   | 2.6%   |
|                                                                                                            | b) probably yes   | Count        | 0      | 6      | 12     | 18     |
|                                                                                                            |                   | % within sex | 0.0%   | 3.5%   | 3.7%   | 3.6%   |
|                                                                                                            | c) probably not   | Count        | 0      | 24     | 65     | 89     |
|                                                                                                            |                   | % within sex | 0.0%   | 14.1%  | 19.8%  | 17.8%  |
|                                                                                                            | d) definitely not | Count        | 0      | 37     | 86     | 123    |
|                                                                                                            |                   | % within pol | 0.0%   | 21.8%  | 26.2%  | 24.6%  |
| Total                                                                                                      |                   | Count        | 3      | 170    | 328    | 501    |
|                                                                                                            |                   | % within pol | 100.0% | 100.0% | 100.0% | 100.0% |

Table S11

| Chi-Square Tests                                                                       |                          |    |                                      |
|----------------------------------------------------------------------------------------|--------------------------|----|--------------------------------------|
|                                                                                        | Value                    | df | Asymptotic Significance<br>(2-sided) |
| Pearson Chi-Square                                                                     | <b>7.989<sup>a</sup></b> | 8  | <b>.435</b>                          |
| Likelihood Ratio                                                                       | 9.199                    | 8  | .326                                 |
| N of Valid Cases                                                                       | 501                      |    |                                      |
| a. 6 cells (40.0%) have expected count less than 5. The minimum expected count is .08. |                          |    |                                      |

Table S12

| Results              |                   |                   |                   |                          |
|----------------------|-------------------|-------------------|-------------------|--------------------------|
|                      | Category a        | Category b        | Category c        | Row Totals               |
| Group 1              | 55 (49.57) [0.59] | 54 (47.35) [0.94] | 18 (30.08) [4.85] | 127                      |
| Group 2              | 34 (39.43) [0.75] | 31 (37.65) [1.18] | 36 (23.92) [6.10] | 101                      |
| <b>Column Totals</b> | 89                | 85                | 54                | <b>228 (Grand Total)</b> |

The chi-square statistic is 14.4009. The  $p$ -value is **.000746**. The result is significant at  $p < .05$ .

<https://www.socscistatistics.com/tests/chisquare2/default2.aspx>

Table S13

| Results              |                   |                   |                   |                 |                          |
|----------------------|-------------------|-------------------|-------------------|-----------------|--------------------------|
|                      | Category a        | Category b        | Category c        | Category d      | Row Totals               |
| Group 1              | 55 (50.02) [0.50] | 54 (47.77) [0.81] | 18 (30.35) [5.02] | 9 (7.87) [0.16] | 136                      |
| Group 2              | 34 (38.98) [0.64] | 31 (37.23) [1.04] | 36 (23.65) [6.45] | 5 (6.13) [0.21] | 106                      |
| <b>Column Totals</b> | 89                | 85                | 54                | 14              | <b>242 (Grand Total)</b> |

The chi-square statistic is 14.8303. The  $p$ -value is **.001968**. The result is significant at  $p < .05$ .

<https://www.socscistatistics.com/tests/chisquare2/default2.aspx>

Table S14

| Results              |                   |                   |                   |                          |
|----------------------|-------------------|-------------------|-------------------|--------------------------|
|                      | Category a        | Category b        | Category c        | Row Totals               |
| Group 1              | 34 (33.67) [0.00] | 31 (30.21) [0.02] | 36 (37.12) [0.03] | 101                      |
| Group 2              | 5 (5.33) [0.02]   | 4 (4.79) [0.13]   | 7 (5.88) [0.21]   | 16                       |
| <b>Column Totals</b> | 39                | 35                | 43                | <b>117 (Grand Total)</b> |

The chi-square statistic is 0.4207. The  $p$ -value is **.810283**. The result is not significant at  $p < .05$ .

<https://www.socscistatistics.com/tests/chisquare2/default2.aspx>

Table S15

| Results              |                   |                   |                   |                 |                          |
|----------------------|-------------------|-------------------|-------------------|-----------------|--------------------------|
|                      | Category a        | Category b        | Category c        | Category d      | Row Totals               |
| Group 1              | 34 (33.61) [0.00] | 31 (30.16) [0.02] | 36 (37.06) [0.03] | 5 (5.17) [0.01] | 106                      |
| Group 2              | 5 (5.39) [0.03]   | 4 (4.84) [0.14]   | 7 (5.94) [0.19]   | 1 (0.83) [0.04] | 17                       |
| <b>Column Totals</b> | 39                | 35                | 43                | 6               | <b>123 (Grand Total)</b> |

The chi-square statistic is 0.4599. The  $p$ -value is **.927612**. The result is not significant at  $p < .05$ .

<https://www.socscistatistics.com/tests/chisquare2/default2.aspx>
