# Supplementary material
Source: MDPI journal article supplement (https://www.mdpi.com/2071-1050/14/17/10728)
Supplement: s1 [file s1]

Archive with 2 entries (2 files):
- Database.xlsx
- Tables_Supplementary Material.pdf
