# Supplementary material
Source: MDPI journal article supplement (https://www.mdpi.com/2071-1050/14/17/10728)
Supplement: s1 [file s1 › Database.xlsx]

## Sheet: 1. одговори из упитника
Временска ознака	Pol	Godine starosti	Nacionalnost	Da li ste zdravstveno osigurani?	Ako ste zdravstveno osigurani, koju vrstu zdravstvenog osiguranja imate?	1. Da li ste primili vakcinu protiv virusa KOVID-19?	2. Ako ste na prethodno pitanje odgovorill potvrdno, da li ste primili obe predviđene doze vakcine?	3. Ako ste primili samo jednu dozu vakcine, koji su razlozi?	4. Da li planirate da primite i treću dozu vakcine?	5. Koji su razlozi za treću dozu vakcine?	6. Ako niste vakcinisani, da li planirate da primite vakcinu protiv virusa KOVID-19?	7. Ako ste na prethodno pitanje odgovorili pod b, c ili d, koji su razlozi?	8. Ako ne verujete da Vam je potrebna vakcina, koji su razlozi?	9. Ako ne verujete u vakcine generalno i/ili smatrate da nisu korisne, navedite ključne razloge.	10. Šta bi Vas navelo na promenu mišljenja u pogledu vakcinacije?	11. Koji su Vaši konkretni predlozi za unapređenje politike vakcinacije?	12. Da li želite nešto da dodate u vezi s vakcinacijom, a da Vas prethodno nismo pitali?
2021-10-03 16:45:11	ženski	29	Srpkinja	da	drugo	da	da		ne							Eventualna gostovanja stručnog osoblja iz drugih zemalja
2021-10-04 04:04:52	muški	39		da	državno	da	da		da	prve dve: sinofarm, bez antitela; zaštita svakako opada s vremenom; prilika za pojačanje zaštite					rezultati istraživanja koji bi pokazali ozbiljne velike rizike vakcinacije	uvodjenje obavezne vakcinacije čitavog stanovništva	ne
2021-10-04 06:01:53	muški	29	Srpsko	da	drugo	ne					b) verovatno da	mrzi me			Potvrda da stvarno deluju
2021-10-04 07:48:14	ženski	29	Srpska	da	državno	da	da		da	Povećanje otpornosti na virus
2021-10-04 08:16:04	ženski	29	Srpkinja	ne		da	da		da	Gradjenje boljeg imunog odgovora na nove sojeve virusa					Masovno lose reakcije na vakcinu	Bolja kampanja, pribliznije informacije o tome kako vakcina radi i zasto je korisna, bolje sprovodjenje mera
2021-10-04 08:24:46	muški	28	srpsko	da	privatno	da	da		da	Prevencija protiv COVID 19 kroz ojacan imunitet, drustvena odgovornost i zastita onih koji vakcinu ne mogu da prime
2021-10-04 09:19:25	ženski	24		da	državno	da	da		da
2021-10-04 09:26:43	ženski	47	srpska	da	državno	da	da		da	povećanje imuniteta						Potrebno je bolje obaveštavati građane o postupku vakcinacije i načinima kako vakcina pomaže u odbrani od bolesti. Država nije radila ništa po tome pitanju, dok su protivnici vakcinacije bili izuzetno aktivni. Običan čovek je zbunjen i nema na osnovu čega da donese odluku. Npr, moja majka (70) je išla da primi treću dozu vakcine i zamolila medicinsko osoblje koje je tamo bilo prisutno da je posav…
2021-10-04 10:06:50	muški	21	Srbija	da	državno	da	da		da	Bolji imuni odgovor						Covid propusnice i obavezna vakcinacija za odredjene grupe
2021-10-04 10:24:46	muški	29	Srpska	da	privatno	da	da		ne	I za prve dve sam bio primoran zbog posla	d) definitivno ne	Ne zelim da unosim u organizam nesto sto nije provereno	b) ne verujem da je virus KOVID-19 ozbiljna bolest, c) već sam preležao virus KOVID-19, e) ne smatram da su vakcine korisne, f) ne verujem Kriznom štabu		Za pravu vakcinu ne treba uverenja. Ovo sto se sada desava mislim da je genska terapija i da ovo nisu vakcine
2021-10-04 10:25:38	ženski	28	srpska	da	državno	da	da		da							edukacija stanovnistva.
2021-10-04 11:02:54	ženski	28	Srpska	da	državno	da	da		da	Veca zastita
2021-10-04 12:25:08	ženski	27	Srpkinja	da	državno	da	da		da	Boost-ovanje imunog sistema na KOVID-19						Vise edukacije o virusi i vakcinaciji, kao i diskusije javnosti sa ljekarima i naucnicima
2021-10-04 12:26:17	ženski	31	Srpska	da	državno	ne					d) definitivno ne	a) sačekao/la bih kako bih se uverio/la da je vakcina bezbedna, te je možda primim kasnije, b) zabrinut/a sam zbog mogućih neželjenih dejstava vakcine
2021-10-04 15:25:30	ženski	28	Srpkinja	da	državno	da	da		da	Primila sam i trecu buster dozu						Da se yavrsi pandemija i da ljudi ne umiru	Prinudna vakcinacija za sve
2021-10-04 16:18:40	muški	23	Srbin	da	državno	da	da		da
2021-10-04 17:05:59	ženski	30	Srbin	da	državno	da	da		da
2021-10-04 17:18:43	ženski	27	Srpska	da	državno	da	da		da	Primljena je već. Da se pojača imunski odgovor.	a) definitivno da					Da bude obavezna.
2021-10-04 17:41:46	ženski	32	Srpska	da	državno	da	da		da	Veća sigurnost						Širi medijski prostor o potrebi vakcinisanja
2021-10-05 00:46:13	muški	25	Srbin	da	privatno	da	da		da	Imunitet nije vecan, smanjujen rizik
2021-10-05 03:31:06	muški	21		da	državno	da	da		da
2021-10-05 11:23:59	ženski	24	Srpska	da	državno	da	da		da	Da bih se zastitila, da bih zasititila svoje okruzenje i ljude medju kojima se krecem i da bih pomogla da se zaustavi ova prokleta epidemija i da bismo se vec jednom vratili skroz normalnom zivotu, bez maski i distance.						Da se vise govori o tehnologijama vakcina, tj. kako one rade. Sto u medijima i na internetu, sto i uzivo kako moze da se podize svest da vakcine nisu nista opasno. Ako ljudi znaju na koji nacin funkcionise vakcina i da to nije nikakva magija, stetna hemija ili cipovi, pre ce pristajati i da se oni vakcinisu.
2021-10-06 21:13:13	ženski	32	Srpska	da	državno	da	da		da	Isti kao i za prve dve, da zastitim svoje zdravlje koliko je to moguce i zdravlje mojih bliznjih.						Nisam sigurna,mozda neka bolja edukacija o tome.	Nemam
2021-10-09 22:54:01	ženski	28	Srpkinja	da	državno	ne					c) verovatno ne	a) sačekao/la bih kako bih se uverio/la da je vakcina bezbedna, te je možda primim kasnije
2021-10-11 10:22:20	muški	22		da	državno	da	da		da	Poboljšanje imuniteta						Koherentne informacije iz medija, stručnjaci koji će da pričaju o onome šta ljudima nije jasno.
2021-10-11 23:53:27	ženski	26	Srbija	da	državno	da	da		ne	Dok je ne zahtevaju za putovanje ne vidim potrebu da se vakcinisem		b) zabrinut/a sam zbog mogućih neželjenih dejstava vakcine	c) već sam preležao virus KOVID-19		Naucna potvrdjenost efikasnosti, kao i nezeljenih dejstava	Da razliciti naucnici i lekari iznose svoje stavove uz obrazlozenja na jeziku bliskom narodu
2021-10-12 10:13:31	ženski	27	srpska	da	državno	da	da		da
2021-10-14 12:23:21	muški	24	Srpsko	ne		da	da		ne
2021-11-09 11:44:10	muški	16	Srbin	da	državno	ne					c) verovatno ne	Zato što nemam osećaj žurbe, jer nevakcinacija ne utiče na dnevni život, i nisam u rizičnoj grupi.			Jasne prepreke u dnevnom životu, zbog kojih bih morao da se vakcinišem.	Postavljanje jasnih prepreka u dnevnom životu, zbog kojih bi ljudi, koji nisu ni protiv, ali ni za, otišli da se vakcinišu.
2021-11-09 12:07:08	muški	17	Srpska	da	privatno	da	da		da
2021-11-09 12:30:41	ženski	17	Srpska	da	državno	da	da		da	Da zaštitim sebe i druge.
2021-11-09 16:21:51	ženski	17	Srbija	da	državno	da	da		ne
2021-11-21 10:08:13	ženski	20	srpska	da	državno	da	da		da	isti kao i za prve dve, radi zaštite i zdravlja
2021-11-21 11:26:31	ženski	18	Srpkinja	da	državno	ne	ne	Nisam primila nijednu			b) verovatno da	b) zabrinut/a sam zbog mogućih neželjenih dejstava vakcine		Nije da ne verujem ali nisam 100% sigurna u njih			Da vakcina bude obavezna
2021-11-21 12:04:12	muški	38	Srbin	da	državno	da	da		da	Redovnost						Ispitati posledice
2021-11-22 00:06:50	muški	23		da	državno	ne					c) verovatno ne	a) sačekao/la bih kako bih se uverio/la da je vakcina bezbedna, te je možda primim kasnije, b) zabrinut/a sam zbog mogućih neželjenih dejstava vakcine	c) već sam preležao virus KOVID-19, d) koristim maske i druga preventivna sredstva
2022-01-17 12:23:32	muški	34	Srpska	da	državno	da	da		da	Veci stepwn zastite
2022-01-17 12:33:36	ženski	45	Srpska	da	državno	da	da		da	Primila sam je jer verujem u vakcinaciju
2022-01-17 12:42:37	muški	35	srpska	da	državno	da	da		da	Već sam primio i treću dozu, razlog je što smatram da nivo zaštite vremenom opada.						U autoritarnom sistemu nije moguće unaprediti politiku vakcinacije jer građani ne veruju državnim organima. Tako da najpre mora doći do promene režima.
2022-01-17 12:43:04	ženski	26	srpska	da	privatno	ne					c) verovatno ne	a) sačekao/la bih kako bih se uverio/la da je vakcina bezbedna, te je možda primim kasnije		Apsolutno podrzavam sve vakcine, osim vakcine za covid19	Rezultati
2022-01-17 12:44:08	muški	31	Srpska	da	državno	ne					b) verovatno da	b) zabrinut/a sam zbog mogućih neželjenih dejstava vakcine			Širi koncenzus lekara i jedinstveno mišljenje lekara. Previše različitih stavova, dezinformacija.	/	/
2022-01-17 12:45:24	ženski	44	Srpska	da	državno	da	da		da	Pojačan imunitet usled povećanog broja zaraženih					Ništa, primila sam tri doze i ostajem pri stavu da je vakcina najbolji način da se iznorimo sa pandemijom
2022-01-17 12:47:44	muški	51	Srpsko	da	državno	da	da		da	Dodatna sigurnost
2022-01-17 12:52:05	ženski	40	Srpska	da	državno	da	da		da	Booster						Uspostavljanje poverenja u zdravstveni sistem u celini
2022-01-17 12:53:53
2022-01-17 12:54:55	ženski	38	Srpkinja	da	državno	ne					c) verovatno ne	a) sačekao/la bih kako bih se uverio/la da je vakcina bezbedna, te je možda primim kasnije, d) ne verujem da mi je potrebna vakcina	a) smatram da ne pripadam rizičnoj grupi, c) već sam preležao virus KOVID-19, e) ne smatram da su vakcine korisne	Vakcinisani oboljevaju, prenose virus i imaju komplikacije	Efikasnost vakcinacije
2022-01-17 12:56:22	muški	30	Republika Srbija	da	državno	da	da		da	Jačanje imuniteta, bolja otpornost protiv ove zarazne bolesti.
2022-01-17 13:02:19	ženski	45	srpska	da	državno	ne					d) definitivno ne		a) smatram da ne pripadam rizičnoj grupi, c) već sam preležao virus KOVID-19, e) ne smatram da su vakcine korisne	Vakcine ne sprečavaju transmisiju, a nisu ni garancija da se ne može dobiti teži oblik bolesti ili umreti, te je stoga lična odluka, tj. lični rizik da li primiti ili ne, bez obzira na statistiku.	Trenutno ništa jer sam preležala pre godinu dana, a smatram da je malo vremena prošlo za ispitivanja neželjenih efekata, o kojima se skoro i ne priča.	Ukloniti političare iz odlučivanja i dozvoliti razmenu mišljenja među naučnicima i lekarima, kako bi javnosti bila na raspolaganju trasparentnost razloga ZA i PROTIV vakcine. Verujem da bi ispitivanja bezbednosti vakcine u trajanju od najmanje 5 godina povratila poverenje ljudi, da ne treba nametati obaveznu vakcinaciju već samo preporučivati starijima od 65 godina ili rizičnim grupama, kao za gr…	Od početka je sve ovo mnogo više od samog virusa i vakcina. Napravljen je razdor među ljudima potpuno neopravdano i propagira se jednoumlje za koje u nauci ne treba da bude mesta. Postoji toliko nelogičnosti i pitanja bez odgovora da sve ove mere u navodnoj borbi protiv virusa vređaju inteligenciju i zdrav razum, a najmanje doprinose očuvanju zdravlja ljudi. Ako su vakcine dovoljno bezbedne i efi…
2022-01-17 13:06:19	ženski	46	Srpska	da	državno	da	da		da	Hoću da povećamo stepen zaštite i da time povećamo osećaj sigurnosti					Ništa	Nemam, eventualno kažnjavanje
2022-01-17 13:10:17	ženski	43	srpkinja	da	državno	da	da		da	Primila booster dozu. Verujem naucnim argumentima vise nego pretpostavkama i glasinama.						Populaciju nase drzave treba edukovati u smislu efikasnosti vakcinacije, smatram da je narod nedovoljno upucen i zato nepoverljiv.
2022-01-17 13:22:50	ženski	37	Srpska	da	državno	da	da		da
2022-01-17 13:26:49	muški	23	Srbin	da	državno	da	da		da	Već sam primio treću dozu						1. Ukidanje kovid propusnica. Epidemiološki su neopravdane jer ako neko može da se zarazi pre 20 časova, može i posle toga, a uslovljavanje boravka u ugostiteljskim objektima posle tog perioda vakcinicacijom samo još više pojačava otpor prema istoj. 2. Objavljivanje edukativnog sadržaja o samom virusu kao i o vakcini, s obzirom da otpor prema vakcinaciji vuče korene iz neinformisanosti ili dezinf…	Možda je kasno za unapredjivanje politike vakcinacije s obzirom da je na tom putu napravljeno previše grešaka poput: plaćanja iznosa od 3.000 dinara vakcinisanima, prenagljena i loše organizovana zatvaranja itd...
2022-01-17 13:37:26	ženski	35	Srpska	da	državno	da	da		da	Da budem jos sigurnija						Edukacija i stroze kazne	Ne
2022-01-17 13:47:15	muški	45	Srbin	da	državno	da	da		da		a) definitivno da
2022-01-17 13:50:24	muški	44	Srbin	da	državno	ne					c) verovatno ne	d) ne verujem da mi je potrebna vakcina	c) već sam preležao virus KOVID-19, f) ne verujem Kriznom štabu		Ukoliko nakon primljene vakcine osoba ne bi mogla da oboli. Kao na primer što je slučaj sa vakcinama za boginje m
2022-01-17 13:59:40	ženski	41	Srpska	da	državno	da	da		da	Vec primila						Obavezna vakcinacija
2022-01-17 13:59:43	ženski	43	Srpsko	da	državno	da	da		da	Primila i treću dozu, verujem u vakcine.
2022-01-17 14:08:25	ženski	30	Srpska	da	drugo	da	da		da	Zastita od virusa
2022-01-17 14:18:54	ženski	44	Srpska	da	državno	da	da		da							Da se prestane sa obmanama
2022-01-17 14:24:10	muški	44	Srbin	da	državno	da	da		da	Vakcinacija je najveći izum medinice						Veća medijska promocije preko stručnjaka o pandemiji
2022-01-17 14:24:42	muški	40	Srbin	da	državno	ne					c) verovatno ne	a) sačekao/la bih kako bih se uverio/la da je vakcina bezbedna, te je možda primim kasnije
2022-01-17 15:29:08	ženski	44	Srpska	da	državno	da	da		da	Preporuka lekara
2022-01-17 15:49:16	ženski	30	Srpska	da	privatno	ne					c) verovatno ne	a) sačekao/la bih kako bih se uverio/la da je vakcina bezbedna, te je možda primim kasnije, d) ne verujem da mi je potrebna vakcina	a) smatram da ne pripadam rizičnoj grupi		Vakcina je proizveden jako brzo i negativni efekti saopštavani su nakon što je imunizacija sprovedena u delo.	Sloboda izbora treba da ostane na snazi. Članovi izbornog štaba ne uživaju nikakav ugled i poverenje građana, treba ih zameniti.
2022-01-17 16:00:29	ženski	39	Srpkinja	ne	drugo	da	da		da	Vakcinu sam primila jer mi je ograniceno kretanje, trenutno sam u inostranstvu i ne mogu koristiti usluge javnog prevoza bez vakcinacije ili pak da se svakog dana testiram. I nije rec samo o javnom prevozu, ograniceni ste u svemu, cak i pod pretnjom da izgubite posao. Rec je Republici Nemackoj, Berlin.				Mislim da je ovo velika politika kontrole poslusnosti celokupnog drustva. Jedino u sta verujem sto se vakcine tice je to da ukoliko obolim od Kovida da ga lakse prebolim, odnosno da me sto brze prodje bolest. Inace nista nisam u boljoj situaciji od onih koji nisu vakcinisani, dakle, mogu da se zarazim, mogu da prenesem.	Moj stav je vakcina NE, ali mi je statusna situacija takva da sam morala da se vakcinisem.	Ne znam sta da kazem, mislim da je Svetska zdravstvena organizacija blagovremeno izigrana sto se tice regulative u pogledu vakcinacije. Smatram pre svega da je to pravo izbora svakog pojedinca, u dusi sam antivakser, ali moj problem trbuhom za kruhom dao je drugacije rezultate.
2022-01-17 16:16:58	ženski	32		da	državno	da	da		da							Usaglaseni stavovi medicinskih radnika i njihovih udruzenja, sa kojima se izlazi u javnost i sta se preporucuje pacijentima, bez obzira na licne stavove!
2022-01-17 16:19:36	ženski	51	srpska	da	državno	ne					c) verovatno ne	a) sačekao/la bih kako bih se uverio/la da je vakcina bezbedna, te je možda primim kasnije	c) već sam preležao virus KOVID-19
2022-01-17 16:20:54	muški	45	Srbin	da	državno	da	da		da
2022-01-17 17:18:55	muški	27	Srbin	da	državno	da	da		da						Vakcine su jedno od najvecih naucnih dostignuca civilizacije. Teorije zavere su nesto sto je oduvek postojalo, pogotovu medju ljudima koji nisu dovoljno informisani, a narocito medju neobrazovanim stanovnistvom, pa tako nije bilo razloga da menjam svoje misljenje. Od pocetka pojave vakcine, bio sam za.	Više stucnih ljudi treba da javno govori o potrebi vakcinacije.
2022-01-17 19:02:02	ženski	29	Srpska	ne		da	da		da	Primila sam vec, zelim da imam trajno imunitet						Konkretno prica da nije bilo nezeljenih dejstva, laksa klinicka slika kod vakcinosanih
2022-01-17 19:07:09	ženski	22		da	državno	ne			ne		d) definitivno ne	b) zabrinut/a sam zbog mogućih neželjenih dejstava vakcine	Smatram da nisu dovoljno ispitane vakcine koje su u ponudi, a takođe moguće je zaražavanje i pored vakcine. Nijedna od ponuđenih nije 100% efikasna.		Garancija proizvođača u njihovu efikasnost i efikasnost u praksi - da štiti od zaražavanja.	Previše se potencira u medijima na vakcinaciji. Smatram da je to lično pravo svakoga. Dosadili su narodu.	Ne
2022-01-17 19:11:48	muški	34	Srbin	da	državno	da	da		da	Promio sam i trecu dozu, iz razloga zdravstvene zastite.						Neophodnist jace kampanje i ukljucivanje javnih licnosti (sportista, pevaca...) kako bi pre svega mladi imali dobre primere.	Smatram da svako ima pravo na izbor, u pogledu vakcine (da li zeli da primi i ne), ali svako ima pravo i na izbor da li zeli da opljačka banku ili ne, i u jednom i u drugom slucaju posledice moraju postoje.
2022-01-17 20:09:48	ženski	29	Srpska	da	državno	da	da		da
2022-01-17 20:51:37	muški	51	Srpska	da	državno	da	da		da	3 doza već primljena. Da se osigura imunitet.						Ulazak u sve javne objekte dozvoljen samo vakcinisanima.
2022-01-17 21:46:32	ženski	47	Srpska	da	državno	da	da		ne
2022-01-18 06:26:04	ženski	23		da	državno	da	da		da
2022-01-18 07:43:09	muški	53	srbin	da	državno	ne					c) verovatno ne	b) zabrinut/a sam zbog mogućih neželjenih dejstava vakcine	f) ne verujem Kriznom štabu	vakcina se ne prima iz 1,2,3,4,.... doza, ako je efikasna
2022-01-18 08:25:47	ženski	48	Srpska	ne		da	da		da	Birokratski			e) ne smatram da su vakcine korisne	I pored vakcine čovek moze da se zarazi, nedovoljno su ispitane...	Vakcine koje su ispitane i proizvedene na institutima koji se bave imunologijom, npr. Lui Paster u Parizu	Vakcinacija i zdravlje ljudi ne sme biti politika!	Ne vrsite pritisak na ljude koji ne zele da se vakcinisu!
2022-01-18 12:11:39	muški	34	Srbin	da	državno	da	da		da	Isti kao i za prvu, pitanje nema smisla.					Veći procenat smrtnosti obolelih koji su vakcinisani u odnosu na nevakcinisane.	Preuzimanje odgovornosti države za sigurnost vakcina i uvođenje obavezne vakcinacije, s tim da država naknađuje štetu ukoliko se vakcina pokaže kao neefikasna
2022-01-18 12:28:27	muški	37	Nebitno	da	državno	da	da	Nije primenjivo	da	Sigurnost				Nije primenjivo	Nije primenjivo	Nije primenjivo	Nije primenjivo
2022-01-18 12:30:29
2022-01-18 13:08:30	ženski	29	Srpska	da	državno	ne					b) verovatno da	a) sačekao/la bih kako bih se uverio/la da je vakcina bezbedna, te je možda primim kasnije, b) zabrinut/a sam zbog mogućih neželjenih dejstava vakcine
2022-01-18 13:11:41	ženski	57	Srpkinja	da	državno	da	da		da	Zaštita moga zdravlja						Edukacija stanovništva, jasna politika zdravstvene zaštite	Ne
2022-01-18 13:13:35	ženski	30	Srpkinja	da	drugo	da	da		da	Sigurost
2022-01-18 13:22:02	ženski	31	Srpska	da	državno	ne					c) verovatno ne	a) sačekao/la bih kako bih se uverio/la da je vakcina bezbedna, te je možda primim kasnije			Dovoljan protok vremena, koji je potreban da se vakcina ispita. Takodje I bolja efikasnost vakcine	Dobri dokazi o efikasnosti vakcine
2022-01-18 13:54:00	muški	34		da	državno	da	da		da	Primio					Velik broj obolelih i izvestan broj umrlih od covid-19 mi daje utisak da vakcine moraju mnogo da se unaprede iako imam utisak da i dalje ljudi primaju vakcine koje su napravljene pre više od godinu dana.
2022-01-18 13:55:18	ženski	30	Srpska	da	državno	ne					c) verovatno ne	b) zabrinut/a sam zbog mogućih neželjenih dejstava vakcine	c) već sam preležao virus KOVID-19
2022-01-18 14:16:13
2022-01-18 14:18:29	muški	25	Srbin	da	državno	ne	ne	Nisam primio	ne	Nisam primio ni prvu ni drugu dozu	d) definitivno ne	d) ne verujem da mi je potrebna vakcina	e) ne smatram da su vakcine korisne, f) ne verujem Kriznom štabu
2022-01-18 14:35:18	ženski	31	Srpska	da	državno	ne	ne		ne		d) definitivno ne	a) sačekao/la bih kako bih se uverio/la da je vakcina bezbedna, te je možda primim kasnije, b) zabrinut/a sam zbog mogućih neželjenih dejstava vakcine	c) već sam preležao virus KOVID-19, e) ne smatram da su vakcine korisne	Ne sve vakcine, ova se pokazala nekorisnom jer ne stiti od virusa. Takodje nijednu vakcinu do sada nije bilo potrebno primiti vise doza, a o samom hemijskom sastavu vakcine ne znam nista	Zabrana na kretanje i normalan zivot	Vakcina ne treba biti politicko pitanje, vec pravo coveka na izbor	Ne
2022-01-18 15:13:55	muški	30	Srbin	da	privatno	da	da		ne	Politicki (vecinom)	c) verovatno ne	d) ne verujem da mi je potrebna vakcina	a) smatram da ne pripadam rizičnoj grupi, b) ne verujem da je virus KOVID-19 ozbiljna bolest, f) ne verujem Kriznom štabu, Prisilna vakcinacija. Podrzavam ako je licni izbor	Generalno verujem u vakcine. COVID vakcine ne verujem zato sto je pitanje ispolitizovano, vrsi se pritisak i generalno mislim da je potrebno bar 10tak godina da bi videli da li su vakcine bezbedne/korisne ili ne. Mislim na ove nove MRA vakcine	Da mediji prestanu da sire paniku	Da mediji prestanu da sire paniku i da se vrstimo normalnom zivotu. Ko ima zelju i potrebu neka se vakcinise, ko ne zeli nemoj da se vakcinise. Svako taj virus nece da ide nigde, prenose ga jednako i vakcinisani i ne vakcinisani. Najveci problem u celoj prici je masa lazi sa obe strane, takozvani krizni stabovi, a i ovi sto veruju da ce Bil Gejts da ih cipuje. Etiketiranje i medijsko lincovanje s…	Licno misljenje, ako treba da umru svi bolesni i preko 80god, a da mi ostali zivimo normalni (imam roditelje koji nisu bas zdravi, imam i baku i deku) onda neka umru. Jednostavan zivotni proces. Ako mogu da ne umru ako prime vakcinu, svakako neka je prime... Ali ne vidim razlog zasto bih ja morao da je primim...
2022-01-18 17:52:43	muški	38	SRBIN	da	državno	ne					c) verovatno ne	d) ne verujem da mi je potrebna vakcina	a) smatram da ne pripadam rizičnoj grupi, b) ne verujem da je virus KOVID-19 ozbiljna bolest, c) već sam preležao virus KOVID-19
2022-01-18 18:41:18	muški	23	srpsko	da	državno	da	da		da	Kako bih povećao zdravstvenu zaštitu, ublažio simptome prilikom eventualnog zaražavanja i zaustavio dalje mutiranje virusa.						Sada je kasno za politiku dobrovoljnog vakcinisanja i smatram da mere treba da budu maksimalno rigorozne. Zabranjen ulaz svugde za nevakcinisane.
2022-01-18 19:27:16	muški	43	Srpska	da	državno	da	da		ne
2022-01-18 20:40:04	ženski	54		da	državno	da	da		da	Kao i prve dve, zaštita zdravlja						Striktno sprovođenje epidemioloških mera i adekvatna kaznena politika
2022-01-18 20:52:12	ženski	31		da	državno	da	da		da							Smena vlasti i dovođenje kompetentnih ljudi na čelo države i institucija.
2022-01-18 21:13:56	ženski	33	Srpkinja	da	državno	da	da		da	Preporuka lekara						Jedinstveni stav struke, koji je nepromenljiv, kao i obaveznost imunizacije
2022-01-18 22:49:51	ženski	38	srpska	da	državno	da	da		ne					Verujem i vakcinisana sam protiv svega i svačega (između ostalog i korone), ali je problematična nedelotvornost vakcine (nema sterilnog imuniteta, itd)		ne uvoditi obaveznu vakcinaciju, ali konačno kontrolisati nošenje maski
2022-01-19 03:06:08	muški	39	Serbian	da	državno	ne	ne		ne		d) definitivno ne	d) ne verujem da mi je potrebna vakcina	b) ne verujem da je virus KOVID-19 ozbiljna bolest, c) već sam preležao virus KOVID-19, g) ne verujem u vakcine generalno		Ništa
2022-01-19 07:18:20	ženski	44	Srpska	da	državno	da	da		da	Primila sam treću dozu da bih zaštitila sebe i druge						Odvojiti politiku vakcinacije od politike stranaka, predsednika, premijerke. Izbegavati kontradiktorne izjave i pravila. Edukacijom ljudi o vakcinaciji treba da se bave lekari mada i oni imaju različita mišljenja.	Narod je zbunjen i nepoverljiv, izjednačava poverenje u vakcinaciju sa poverenjem u režim na čelu države.
2022-01-19 10:14:45	muški	30		da	državno	da	da		da	Primio već. Najviše zbog propusnica i putovanja.						Samo i isključivo nauka u medijima o vakcinama, a ne para-nauka ili razni upitni ljudi koji daju svoje neproverene izjave o vakcinama. Kažnjavanje medija koji dopuštaju iznošenje nedokazanih tvrdnji bez toga da se makar voditelj ili vizuelno usprotive tome i kažu u programu da te tvrdnje nisu dokazane. Slično je bilo u US kada je Tramp iznosio razne teorije koje su bile laži ili poluistine i medi…
2022-01-19 11:08:52	muški	38	Srpsko	da	državno	da	da		da	Zaštita od virusa KOVID-19
2022-01-19 11:14:39	ženski	35	Srpska	da	državno	da	da		da	Vec sam je primila						Bolja objasnjenja zdravstvenih radnika
2022-01-19 11:19:03	muški	23	srpska	da	drugo	ne					b) verovatno da	a) sačekao/la bih kako bih se uverio/la da je vakcina bezbedna, te je možda primim kasnije	c) već sam preležao virus KOVID-19		Da ne potenciraju vakcinaciju	Da ne potenciraju i dopuste ko hoće
2022-01-19 11:34:50	ženski	30		da	državno	da	da		da	Produzenje zastite
2022-01-19 12:46:04	ženski	32	Srpska	da	državno	ne					b) verovatno da	a) sačekao/la bih kako bih se uverio/la da je vakcina bezbedna, te je možda primim kasnije
2022-01-19 12:47:44	muški	33		da	državno	da	da		da
2022-01-19 14:41:41	ženski	28	Srpkinja	da	državno	ne					c) verovatno ne	d) ne verujem da mi je potrebna vakcina	a) smatram da ne pripadam rizičnoj grupi, c) već sam preležao virus KOVID-19, d) koristim maske i druga preventivna sredstva, e) ne smatram da su vakcine korisne
2022-01-19 17:33:43	ženski	49	Srpkinja	da		da	da		da	potpuna zadtita						obavezna vakcinacija sa opravdanim medicinskim izuzecrm	ne
2022-01-19 18:07:48	muški	44	Srpska	da	državno	da	da		da	Pojačana zaštita						Više edukacije preko medija	Ne
2022-01-19 18:58:25	ženski	49	Srpkinja	da	državno	da	da		da	potpuna zastita						obavezna sa medicinsim izuzecem	ne
2022-01-19 19:08:36	ženski	22		da	državno	da	da		da
2022-01-19 19:11:43	ženski	40	Srpsko	da	državno	ne					d) definitivno ne	b) zabrinut/a sam zbog mogućih neželjenih dejstava vakcine, Vakcinacija ne može da bude prinudna već posledica slobodne volje građana čije je uatavno pravo da odlučuju o svom zdravlju i životu.	c) već sam preležao virus KOVID-19, Uredno sam imunizovana ali ova vakcina je nedovoljno istražena i ima mnogo neželjenih dejstava. Stavovi struke su neusaglašeni što još više produbljuje sumnju.	Verujem u vakcine ali ne u vakcinu protiv Covid 19. Razlozi su mnogobrojni.	Stručan i usaglašen stav struke i poverenje u politički sistem zemlje.	Ozbiljniji pristup imunizaciji i kvalitetan i stručan kadar koji odlučuje o pravima građana.	Niste pitali o sastavu vakcine protiv covid19 i neželjenim dejstvima. Valjalo bi zvanično izneti činjenice i statistiku.
2022-01-19 19:35:37	ženski	24	Srb	da	državno	ne			ne		d) definitivno ne	b) zabrinut/a sam zbog mogućih neželjenih dejstava vakcine	smatram da moze da doprinese pogrosanju zdravstvenog stanja		nista	da ostane neobavzna, bez pasosa ili primoravanja na istu
2022-01-19 20:18:12	muški	44	Srbin	da	državno	da	da		da	Zaštita
2022-01-19 20:45:46	ženski	49	Srpkinja	da	državno	da	da	Nisam	da	potpuna zastita					Nista	obavezna vakcinacija sa medicinskim izuzecem
2022-01-19 21:02:19	muški	53	Sebin	da	državno	ne					d) definitivno ne	Preležao sam bolest	c) već sam preležao virus KOVID-19
2022-01-19 21:19:43	muški	27	Po Ustavu Republike Srbije nisam dužan da se izjasnim	da	državno	da	da		ne							Da Krizni štab i državni vrh ne ubedjuju ljude da se vakcinišu, najveću negativnu kampanju obi prave.
2022-01-19 21:27:48	ženski	41	Srpkinja	da	državno	ne	ne		ne		d) definitivno ne	b) zabrinut/a sam zbog mogućih neželjenih dejstava vakcine	f) ne verujem Kriznom štabu				Prvo vakcinu su prebrzo smućkali neverujem prvo našoj vlasti i kako to da ovako mala zemlja od početka nrod može da bira vakcinu kako to da je ona besplatna a test devet hiljada Im još mnogo nelogičnsti
2022-01-19 21:30:38	muški	31	Srbin	da	državno	ne			ne		d) definitivno ne	d) ne verujem da mi je potrebna vakcina	a) smatram da ne pripadam rizičnoj grupi, c) već sam preležao virus KOVID-19				Samo treba biti stvar izbora i ljudi ce pokazati vece poverenje u zdravstveni sistem.
2022-01-20 00:26:36	ženski	36	Srpkinja	da	državno	da	da		ne	Nada da će doprineti da imam blaže simptome u slučaju razboljevanja od KOVID-19 (već sam primila treću dozu).					Izričiti stavovi molekularnih biologa-imunologa da vakcine (više) nisu dovoljno efikasne da bi primanje bilo opravdano, ili da su štetne po zdravlje na neki način.	Zabrana ulazaka nevakcinisanih u sve ugostiteljske objekte, tržne centre, ustanove kulture i sl. (bioskopi, koncerti itd.) i prodavnice koje ne prodaju hranu i lekove (osim za zaposlene istih).	Primila sam već treću dozu, kako sam navela, tako da sam morala da odgovorim da ne planiram da primim treću dozu (iako mi je jasno da je cilj pitanja bio drugačiji).
2022-01-20 03:46:11	muški	27	Srpska	da	državno	ne	ne		ne		d) definitivno ne	c) smatram da je vakcina potrebnija drugima nego meni, d) ne verujem da mi je potrebna vakcina	a) smatram da ne pripadam rizičnoj grupi, b) ne verujem da je virus KOVID-19 ozbiljna bolest, c) već sam preležao virus KOVID-19
2022-01-20 12:13:08	muški	29	Srpsko	da	državno	da	da		da	Primio sam i treću dozu vakcine nemačko-američkog proizvođača Pfizer-Biontech						Politika prema vakcinacija s obzirom da je selektivna je pogrešna. Disklejmer (en. disclaimer) države tj. odricanje od odgovornsoti je jedna od stavki koja je i dovela do povećanog nepoverenja stanovništva u vakcinu. Vakcina kao takva treba biti obaveza, u osnovnoj školi smo primali vakcine zato što smo morali i niko nas nije pitao, a ne zato što smo hteli (čak su se i mnogi plašili uboda igle). …	Obrazloženo u pitanju broj 11. Hvala na anketi.
2022-01-20 17:49:33	ženski	30	Srpska	da	državno	da	da		da
2022-01-20 23:58:08	muški	19	Srbin	da	državno	ne					d) definitivno ne	a) sačekao/la bih kako bih se uverio/la da je vakcina bezbedna, te je možda primim kasnije, b) zabrinut/a sam zbog mogućih neželjenih dejstava vakcine, d) ne verujem da mi je potrebna vakcina, Fajzer obrnuo 217 milijardi prošle godine	a) smatram da ne pripadam rizičnoj grupi, b) ne verujem da je virus KOVID-19 ozbiljna bolest, c) već sam preležao virus KOVID-19, d) koristim maske i druga preventivna sredstva, f) ne verujem Kriznom štabu		Da prodaje 100 godina i da vidim da funkcioniše i da ne traže da se bockam na svaka tri dana	Da ne napinju narod jer je to individualno stvar	Ne
2022-01-21 13:31:17	ženski	44	Srpska	da	državno	ne	ne		ne		d) definitivno ne	a) sačekao/la bih kako bih se uverio/la da je vakcina bezbedna, te je možda primim kasnije, b) zabrinut/a sam zbog mogućih neželjenih dejstava vakcine	b) ne verujem da je virus KOVID-19 ozbiljna bolest, f) ne verujem Kriznom štabu
2022-01-21 17:24:58	ženski	32	Srpska	da	državno	da	da	Prelezala sam kovid	da	Primila sam tri doze vakcine	a) definitivno da		b) ne verujem da je virus KOVID-19 ozbiljna bolest			Informisati detaljnije stanovnistvo I time otkloniti zablude
2022-01-21 17:47:38	ženski	32	Srpska	da	državno	da	da			Jačanje imunog sistema i stvaranju antitela protiv kovida 19						Detaljnije informisanje stanovništva o vakcinama koje su na tržištu. I time unaprediti i povećati procenat vakcinisanih u suzbjanju i širenju kovida 19 u bliskoj budućnosti. Obuka zdrastvenih radnika na većem nivou, a tiče se obrazovanja o kovidu jer je nova pojava na globalnom nivou sa kojom živimo već izvesni period.	Nadam se da će svest ljudi o kovidu 19 i vakcinaciji na nacionlanom i globlanom nivou porasti do te mere da ćemo videti svetlo na kraju tunrela i preimenovati u sezonski grip. Sve zavisi od stanovništva i ponašanja ljudi prema pandemiji koja traje već dve godine.
2022-01-21 19:51:48	muški	62	Srbin	da		da	da		da
2022-01-21 20:40:30	ženski	26	Srbija	da	privatno	ne			ne		c) verovatno ne	a) sačekao/la bih kako bih se uverio/la da je vakcina bezbedna, te je možda primim kasnije, c) smatram da je vakcina potrebnija drugima nego meni, Neću se osećati bezbednije ako je primim pa ne vidim svrhu	a) smatram da ne pripadam rizičnoj grupi, b) ne verujem da je virus KOVID-19 ozbiljna bolest, c) već sam preležao virus KOVID-19, Ne vidim svrhu konstantnog vakcinisanja za sebe	Verujem u vakcine	Vreme, kada mi vreme pokaže da je to dobra odluka, onda ću se vakcinisati	Smanjenje česte promene mišljenja svakog stručnjaka u Srbiji, trebalo bi usmeriti na prenos informacija iz sveta
2022-01-21 20:40:59	muški	40	Srpska	da	državno	da	da		ne	Treca doza stiti samo 70% od Omikrona, a i simptomi Omikrona su kao prehlada.					Relevantni naucni dokazi
2022-01-22 08:45:33	ženski	25	Srpska	da	državno	da	da		ne	Prelezan kovid u skorije vreme, smatram da mi treca doza jos uvek nije potrebna					Apsolutni dokaz u njihovu stetnost	Manje spekulacija i govorancija ljudi koji nisu strucni za to
2022-01-23 10:22:01	muški	38	Srbin	da	državno	da	da		da	Primio sam i treću dozu. Želim da se na taj način dodatno zaštitim.
2022-01-23 11:09:42	muški	38	Srbin	da	državno	ne					d) definitivno ne	b) zabrinut/a sam zbog mogućih neželjenih dejstava vakcine, d) ne verujem da mi je potrebna vakcina, Preležao sam kovid, najviše verujem u prirodni imunitet	a) smatram da ne pripadam rizičnoj grupi, c) već sam preležao virus KOVID-19, f) ne verujem Kriznom štabu, Ne verujem globalistima i "filantropima" smatram da je sve ovo deo njihove agende za porobljavanje i kontrolu čovečanstva		Kada bi globalisti i zastupnici ove agende prestali da se ovako zdušno zalažu za vakcinaciju. Protiv sam svega za šta se oni zalažu. Ne verujem u njihove dobre namere. Kada bi pokazali ravnodušniji stav prema vakcinaciji i kada ne bi diskriminisali nevakcinisane, možda bih i razmislio o promeni stava.	Da se ukine svaka protivustavna diskriminacija ljudi koji imaju negativan stav o vakcinaciji protiv kovida.	Želim, ali bi izašlo iz okvira pristojnosti.
2022-01-23 11:19:38	ženski	37	Nepotrebno izjasnjavanje	da	državno	da	da		da	Bolja zastita						Da bude obavezna	Ne
2022-01-23 11:53:08	ženski	38	Srpska	da	državno	ne			ne		d) definitivno ne	d) ne verujem da mi je potrebna vakcina	c) već sam preležao virus KOVID-19, d) koristim maske i druga preventivna sredstva, f) ne verujem Kriznom štabu		Ne bih promenila misljenje u vezi ove vakcine, dok za ostale vakcine imam pozitivan stav i vakcinisana sam redovno protiv sezonskog gripa kao i za sve ostale redovne obavezne vakcinacije	Politika obavezne vakcinacije je zasnovana na ispitivanim slucajevima, jasnom i transparentnom ispitivanju kontraindikacija vakcina i sprovedenim redovnim fazama ispitivanja i u vezi nje nemam predloge. Politika kovid vakcinacije je politika a ne rad na zdravlju ljudi.	/
2022-01-23 12:53:24	ženski	40	Srpkinja	da	privatno	da	da		da	Potreba za pojacanom odbranom
2022-01-24 09:36:26	ženski	29	srpska	da	državno	ne					c) verovatno ne	b) zabrinut/a sam zbog mogućih neželjenih dejstava vakcine	c) već sam preležao virus KOVID-19, d) koristim maske i druga preventivna sredstva, e) ne smatram da su vakcine korisne, f) ne verujem Kriznom štabu	I vakciniani umiru...			Smatram da bi iste mere trebalo da vaze i za vakcinisane i za nevakcinisane. Vakcinisani nisu nista manje "opasni" od nas nevakcinisanih. Ja sam nevakcinisana dobila koronu od vakcinisanog koji nije zeleo da se testira iako je bolestan i imao je zarazene u porodici, a ja koja zivim sa nevakcinisanim roditeljima, nikome je nisam prenela. Vakcinisana osoba koja je meni prenela i jos jednoj vakcinis…
2022-01-24 09:40:36	ženski	29	srpska	da	privatno	ne					c) verovatno ne	d) ne verujem da mi je potrebna vakcina	e) ne smatram da su vakcine korisne	u ovom slučaju vakcina svakako nije korisna jer čoveka ne štiti od ponovnog zaražavanja virusom, potrebno je više nego jedanput se vakcinisati, i pitanje je koliko dugo če ta celokupna agonija trajati.	Ukoliko bi izmislili vakcinu koju je dovoljno jednom primiti i time rešiti probleme zaražavanja virusom KOVID-19	/	/
2022-01-24 20:55:38	ženski	25		da	državno	ne	ne		ne		c) verovatno ne	b) zabrinut/a sam zbog mogućih neželjenih dejstava vakcine
2022-01-24 21:39:30	muški	50	Srbin	da	državno	ne					c) verovatno ne	d) ne verujem da mi je potrebna vakcina	d) koristim maske i druga preventivna sredstva, f) ne verujem Kriznom štabu			relevantnost potrebe
2022-01-26 12:57:17	muški	47	Srpska	da	državno		da		ne							Razviti vakcine za nove sojeve Kovida-19.	Vakcinacija ne treba da obavezna ako je naučno dokazano da ne sprečava širenje virusa,
2022-01-26 20:17:56	ženski	27	Republike Srbije	da	državno	ne					c) verovatno ne	a) sačekao/la bih kako bih se uverio/la da je vakcina bezbedna, te je možda primim kasnije, b) zabrinut/a sam zbog mogućih neželjenih dejstava vakcine, d) ne verujem da mi je potrebna vakcina	c) već sam preležao virus KOVID-19, d) koristim maske i druga preventivna sredstva, e) ne smatram da su vakcine korisne	Poznajem mnogo ljudi koji su primili vakcinu, a nedugo nakon vakcinacije dobili virus KOVID-19 sa teskom klinickom slikom.
2022-01-28 20:18:28	ženski	32	Srpska	da	državno	ne			ne		d) definitivno ne	b) zabrinut/a sam zbog mogućih neželjenih dejstava vakcine
2022-01-28 20:33:48	ženski	47	RS	da	državno	da	da		da	Primila treću. Jača odbrambeni mehanizam						Surovo ali predloži obavezujućeg karaktera	Istorijsko dostignuće. A mnogi na nju gledaju kao na oružje
2022-01-29 13:15:47	muški	33	srp.	da	državno	ne			ne		d) definitivno ne	d) ne verujem da mi je potrebna vakcina, inat	a) smatram da ne pripadam rizičnoj grupi, c) već sam preležao virus KOVID-19, f) ne verujem Kriznom štabu		ništa,kasno je sad	realan pristup problemz, ovo sve je bilo uvredljivo za zdrav razum	.
2022-01-29 13:23:39	ženski	30	Srpska	da	državno	da	da		da	Da imunizacija bude kompletnija
2022-01-29 13:31:48	ženski	34	Srpska	da	državno	da	da		da	Vec jesam, isteklo vazenje zelenog s.						Nemam predlog, narod pre svega ne veruje vlasti koja vrsi pritisak
2022-01-29 13:38:15	ženski	30	Srpska	da	državno	ne			ne		c) verovatno ne	a) sačekao/la bih kako bih se uverio/la da je vakcina bezbedna, te je možda primim kasnije	c) već sam preležao virus KOVID-19, d) koristim maske i druga preventivna sredstva, e) ne smatram da su vakcine korisne	Vakcinisani se mogu zaraziti i mogu prenositi virus. Poznajem osobe koje su se vakcinisal, preležale covid i imale iste simptome kao nevakcinisani.	Delotvornost, ispitanost i sigurnost vakcina
2022-01-29 13:42:10	ženski	32		da	državno	da	da		da
2022-01-29 13:57:42	ženski	32	Srpkinja	da	drugo	ne	ne		ne		c) verovatno ne	a) sačekao/la bih kako bih se uverio/la da je vakcina bezbedna, te je možda primim kasnije, b) zabrinut/a sam zbog mogućih neželjenih dejstava vakcine	b) ne verujem da je virus KOVID-19 ozbiljna bolest, c) već sam preležao virus KOVID-19, f) ne verujem Kriznom štabu, g) ne verujem u vakcine generalno
2022-01-29 14:08:41	ženski	56	Srpska	da	državno	da	da		da	imunizacija						Smanjenje pritiska i manipulacije a povećanje stručnih objašnjenja vezanih za prednosti i moguće posledice vakcinacije.	ne
2022-01-29 14:22:48	muški	30	srbin	ne	privatno	da	da		ne	plasim se da nedobijem temperaturu od reacije a nemam para da se lecim jer tako sam proso posle druge, a drzava ne daje zdabe lekove sve se placa. jeste glup odgovor ali sto posto samo iz tog razloga
2022-01-29 14:57:56	ženski	26	Srpska	da	državno	da	da		da	Kako se javljaju novi sojevi zelim da budem sto bezbednija
2022-01-29 15:04:16	ženski	40	Србска	da	državno	ne					d) definitivno ne	a) sačekao/la bih kako bih se uverio/la da je vakcina bezbedna, te je možda primim kasnije	c) već sam preležao virus KOVID-19	Непотребно је вакцинисати човека који је природно имунизован. Недовољна испитаност вакцина. Велики притисак на јавност у погледу вакцинације Опречне информације на медијима Много научно недоказаних ставова у погледу делотворности вакцина	Ништа		Доста се говори о вакцинацији као једином начину имунизације. Свуда се поставља питање да ли сте ваксинисани? Притом се запоставља сегмент природне имунизације. Треба постављати питање: Да ли сте имунизовани? Природно или вакцинацијом?Зашто ограничавати слободу здравом човеку! Па то се није радило ни у средњем веку.
2022-01-29 15:10:20	muški	73	српска	da	državno	da	da		da	mišljenje struke					Vakcinisan sam	Obaveznost(osim slučajeva)
2022-01-29 15:35:51	ženski	43	Srpkinja	da	državno	da	da		da	Primljena 3.doza jer smatram da je time produzena bezbednost od komplikacija u slucaju zaraze virusom civid 19.
2022-01-29 15:55:19	muški	39	Srpsko	da	privatno	da	da		ne							Više ispitivanja
2022-01-29 16:05:35	ženski	36	Srbija	da	državno	ne					c) verovatno ne	b) zabrinut/a sam zbog mogućih neželjenih dejstava vakcine	c) već sam preležao virus KOVID-19		Pouzdana naučna istraživanja potkrepljena činjenicama i dokazima o minimalnim neželjenim dejstvima vakcina protiv virusa Covid-19	Ostaviti pojedincima mogućnost izbora i ne stvarati pritisak koji još više odbija ljude.
2022-01-29 16:24:39	muški	43	Srbin	da	državno	da	da		ne						Jedino ako se utvrdi da nisu delotvorne	Ne vrsiti tihu maltene prisilnu vakcinaciju
2022-01-29 16:33:54	ženski	50	Srpska	da	državno	da	da		da	Sigurnost						Zakonska obaveza!	/
2022-01-29 19:47:38	ženski	32	Srpska	da	državno	da	da		da	Nemam više antitela.						Obavezna vakcinacija
2022-01-29 21:33:41	muški	30	Srbin	da	državno	da	ne	Morao sam zbog posla	ne				b) ne verujem da je virus KOVID-19 ozbiljna bolest
2022-01-30 00:37:14	muški	34	Srbin	da	državno	da	da		da	Dodatna zastita						Pozitivna kampanja i pozitivni primeri. Ujednaceni stavovi struke i smanjenje prostora za pseudonaucne stavove (pogotovo kada ih iznose lica koja bi trebalo nominalno da budu predstavnici struke). Otvorena prica o nuspojavama i eventualnim problemima vezanim za vakcinaciju.
2022-01-30 13:26:30	ženski	60	srpska	da	državno	da	da		da	već sam primila 3. dozu						Istraživanja o kovidu i vakcinama
2022-01-30 19:30:51	muški	53	srbin	da	državno	ne					c) verovatno ne	b) zabrinut/a sam zbog mogućih neželjenih dejstava vakcine	f) ne verujem Kriznom štabu
2022-01-31 20:55:02	ženski	44	srpska	da	državno	da	da	n/a	da	Već sam primila i 3.dozu vakcine zarad postizanja očekivanog booster efekta vakcinacije						Kampanja javno podržana od strane države, formiranje NITAG-a (National Immunization Technical Advisory Group) koji bi se regularno sastajao, razmatrao najnovije podatke o vakcinama i davao preporuke "Batutu" koji bi, kao krovna ustanova, donosio pravilnike mnogo češće na osnovu tih preporuka (a ne na svake 3 godine). Takođe, predlažem da sve vakcine budu na tzv. pozitivnoj listi, tj. finansirane …	Važno je da postoji centralni e-registar vakcinisanih kako bi se jednostavno došlo do podataka o aktuelnom broju (procentu) vakcinisanih (i nevakcinisanih) i tako usmeravala/prilagođavala strategija imunizacije. Važno je država radi i na prikupljanju podataka o određenim bolestima (npr. cervikalni karcinom, rotavirusne infekcije, male boginje...), takođe sa ciljem usmeravanja strategije imunizaci…
2022-01-31 21:17:15	ženski	45	srpska	da	državno	da	da		da	preporuka da se primi radi poboljsanja imunog odgovora						uvodjenje odredjenih mera za nevakcinisane-preuzeti primere iz zemalja EU koje su takve mere vec uveli
2022-01-31 21:23:10	muški	40	hrvat	da	državno	ne			ne		d) definitivno ne	a) sačekao/la bih kako bih se uverio/la da je vakcina bezbedna, te je možda primim kasnije, b) zabrinut/a sam zbog mogućih neželjenih dejstava vakcine, c) smatram da je vakcina potrebnija drugima nego meni, d) ne verujem da mi je potrebna vakcina, postoje alternativni tretmani (koji nisu dostupni barem na vlastiti rizik)	a) smatram da ne pripadam rizičnoj grupi, c) već sam preležao virus KOVID-19, f) ne verujem Kriznom štabu, rizik od nuspojava je puno veci nego steci prirodni imunitet zarazom. Dugorocne posljedice cjepiva nisu poznate i proizvodjaci ne zele preuzeti odgovornost za cjepiva.		Znanstveni dokazi utemeljeni na propitivanju i potvrdi ucinkovitosti cjepiva kroz redovni proces testiranja. Eksperimantalno cjepivo, uvjetno odobreno, bez preuzimanja odgovornosti za moguce posljedice ne ulijeva nikakvo povjerenje.	otvorena i transparentna komunikacija prema narodu. Istinito reci cinjenice bez politike.	Cjepiva nisu jedini nacini borbe protiv ove bolesti i strasno je da znanstvena zajednica u cijelom svijetu ne daje priliku istraziti alternative. Za bilo koju bolest na svijetu pozeljno je istraziti alternativne nacine lijecenja koji mozda omogucuju bolje rezultate, lakse ih podnose pacijenti, imaju manje nuspojava i sl. Unaprijed odbaciti alternativa istrazivanja, negirati drugacija misljenja be…
2022-01-31 21:25:32	ženski	47	Srpkinja	da	državno	da	da		da	Vec sam primila zbog produzetka zastite						Edukacija i podozanje poverenja u drzavni sistem
2022-01-31 21:30:06	muški	31	Srpska	da	državno	da	da		da	Administrativni i finansijski- mogucnost za slobodnim kretanjem, kao i ne placanje antigenskih ili pcr testova u slucaju neophodnosti.			e) ne smatram da su vakcine korisne, f) ne verujem Kriznom štabu, Verujem da je prirodno steceni imunitet bolja zastita od vakcine.	Verujem i vakcine, ali ne u vakcine koje nas stite od covid-19.		Prestanak diskriminacije i sloboda izbora.	Srecno sa upitnikom i zapamtite da nisu svi nevakcinisani antivakseri ili nizeg stepena obrazovanja i svesti, kao i da svi vakcinisani nemaju pozitivan stav o vakcinaciji.
2022-01-31 21:37:29	ženski	33	Srpkinja	da	državno	da	da		da	Vec sam primila trecu dozu u cilju sprecavanja sirenja virusa i jacanja imuniteta, kao i smanjenja mogucnosti hospitalizacije u slucaju zarazavanja
2022-01-31 21:38:42	muški	36	Srbin	da	državno	da	da		da	Vec sam primio trecu dozu. Da zastitim sebe i druge						Mnogo vise raditi na edukaciji kako lekara tako i stanovnistva
2022-02-01 07:59:37	muški	44	Srpska	da	državno	da	da		da	Zaštita od bolesti i komplikacija
2022-02-01 08:21:08	ženski	42	srpska	da	državno	da	da		da	Zastita						obavezna
2022-02-01 08:40:24	muški	30		da	privatno	da	da		ne	Imao sam i blagi kovid	b) verovatno da	c) smatram da je vakcina potrebnija drugima nego meni	a) smatram da ne pripadam rizičnoj grupi, c) već sam preležao virus KOVID-19
2022-02-01 08:40:41	ženski	37	Srpsko	da	privatno	da	da	/	da	Kad budem u zdravstvenoj mogućnosti, odmah ću da primim kako bi se dodatno imunizovala.
2022-02-01 08:55:35	ženski	33	Srpkinja	da	državno	da	da		da							Da se ne daje ljudima/pacijentima da biraju koju ce vakcinu, to doprinosi nepoverenju ljudi prema vakcinama i stvaranju bojazni, jer se ocekuje da lekar kaze sta je nabolje za svakog pojedinca.
2022-02-01 08:56:05	ženski	37	Srpska	da	državno	da	da		da	Buster doza, pojacavanje imunog sistema
2022-02-01 09:12:00	ženski	46	srpska	da	državno	da	da		da	Jača odbrana od virusa						Bolja, organizovanija i temeljnija edukacija svih slojeva stanovništva o koristima koje pruža vakcinacija.
2022-02-01 09:15:11	ženski	34		da	državno	da	da		da
2022-02-01 09:28:40	muški	29	srpska	da	privatno	ne	ne		ne		c) verovatno ne	Sumnjam u procenat efikasnosti trenutno postojećih vakcina. Mislim da trenutno dostupne vakcine ne štite od omikron soja, a prethodno se nisam vakcinisao jer sam preležao i imao sam antitela prisutna i godinu dana od preležane bolesti. I pored kontakta sa zaraženima do pojave omikron soja, nisam opet oboleo. To su razlozi iz kojih se nisam prethodno vakcinisao, a u ovom trenutku ne planiram jer m…	c) već sam preležao virus KOVID-19		Odgovoreno u sklopu pitanja broj 7.	Promena pristupa. Uverili smo se da je situacija sa vakcinacijom na globalnom nivou politizovana. U određenim zemljama se samo neke vakcine prihvataju, a druge ne iako su na listi WHO i zadovoljavaju npr. zahteve EMA da dobiju dozvolu za vakcinu kao dovoljno efikasne, bezbedne i kvalitetne. U situaciji u kojoj se nalazimo, mislim da je kontraproduktivno vršiti kampanju ka obaveznoj vakcinaciji, s…
2022-02-01 09:37:42	muški	34	Srbin	da	državno	ne					c) verovatno ne	a) sačekao/la bih kako bih se uverio/la da je vakcina bezbedna, te je možda primim kasnije, b) zabrinut/a sam zbog mogućih neželjenih dejstava vakcine
2022-02-01 09:40:07	ženski	56	srpska	da	državno	da	da		da	preporuke o efikasnosti						da bude obavezna za sve koji ulaze u sisteme ( zdravsto, skolstvo, firme) i da se to sprovede
2022-02-01 09:47:11	muški	30	Srbijanska	da	privatno	da	da	N/A	ne	N/A						Samo da se uloži veći napor u edukaciju stanovništva. Pogotovo po pitanju već ustanovljenih i efikasnh vakcina, kao i vakcina koje tek dolaze u upotrebu kod nas, poput HPV vakcine, koja donosi izuzetne pozitivne efekte.	Vakcinisam sam, međutim, utisak mi je da vakcine protiv kovida nisu potvrdile efikasnost i efekte koje očekujemo od vakcina. Nisu doprinele stvaranju kolektivnog imuniteta.
2022-02-01 09:52:41	muški	24	Srpska	da	državno	ne					c) verovatno ne	a) sačekao/la bih kako bih se uverio/la da je vakcina bezbedna, te je možda primim kasnije, b) zabrinut/a sam zbog mogućih neželjenih dejstava vakcine, c) smatram da je vakcina potrebnija drugima nego meni, d) ne verujem da mi je potrebna vakcina	a) smatram da ne pripadam rizičnoj grupi, b) ne verujem da je virus KOVID-19 ozbiljna bolest, c) već sam preležao virus KOVID-19, d) koristim maske i druga preventivna sredstva, f) ne verujem Kriznom štabu	Vakcine su korisne za ostale bolesti, za KOVID-19 baš i ne.	Vakcinacija je preko potrebna, i do sad sam primio sve vakcine koje su bila preporuka ministarstva. Samo za Kovid vakcine ne vidim razlog, ne pripadam kritičnoj grupi a i preležao sam već infekciju.	Edukacija građana
2022-02-01 11:12:17	ženski	37	Srpsko	da	privatno	da	da		da	dodatna zaštita						obavezna vakcinacija :-)
2022-02-01 11:14:35	muški	30	srpska	da	državno	da	da		da	Preporuka lekara						Uvodjenje obavezne vakcinacije
2022-02-01 12:04:04	ženski	42	srpska	da	državno	da	da		da	Primila sam i 3.dozu, odrzavanje nivoa antitela
2022-02-01 12:10:13	muški	45	srpsko	da	državno	da	da		da	vec sam primio						drzavni odgovor
2022-02-01 12:16:24	ženski	44		da	državno	da	da		ne
2022-02-01 12:22:33	ženski	24	Srbija	da	državno	ne					c) verovatno ne	a) sačekao/la bih kako bih se uverio/la da je vakcina bezbedna, te je možda primim kasnije, d) ne verujem da mi je potrebna vakcina	c) već sam preležao virus KOVID-19
2022-02-01 12:57:21	ženski	38	Srbije	da	privatno	da	da		ne	Kontradiktorne informacije					Jasne, kredibilne informacije.	Jasne, kredivilne informacije.
2022-02-01 16:48:33	muški	30	Srbska	da	drugo	da	da	Ni prve dve nisam samovoljno primio. Morao zbog posla.	ne	Ni prve dve nisam hteo primiti.	d) definitivno ne	Ovo nisu vakcine koje pomazu.	b) ne verujem da je virus KOVID-19 ozbiljna bolest, c) već sam preležao virus KOVID-19, f) ne verujem Kriznom štabu, Ovo nisu prave vakcine vec biolosko oruzje.	Nisu ovo prave vakcine koje pomazu narodu. Brojni medicinski dokazi ukazuju na to da je ovo sve osim lekovite vakcine.	Nista	Ukinuti sve mere i pustiti ljude da zive normalno.	Ukinuti vakcine i sve ostale mere
2022-02-04 15:00:54	ženski	25		da	državno	da	da		da	putovanja
2022-02-07 00:32:49	ženski	19	Srpska	da	državno	da	da		da
2022-02-09 11:18:43	ženski	27	Srpkinja	da	državno	ne		/	ne	/	b) verovatno da	b) zabrinut/a sam zbog mogućih neželjenih dejstava vakcine	c) već sam preležao virus KOVID-19	/	/	/	/
2022-02-09 11:28:24	ženski	29	Srpkinja	da	privatno	da	da	/	ne	/	a) definitivno da		a) smatram da ne pripadam rizičnoj grupi	/	Zastita svoje dece	/	/
2022-02-09 14:18:29	muški	21	Srbin	da	državno	da	da		da	Preporuka stručnjaka					Veoma ozbiljna istraživanja i masovno uporedno testiranje vakcinisanih i nevakcinisanih.	Obavezna vakcinacija	Ne
2022-02-15 19:29:41	ženski	46	Srpkinja	da	državno	ne					d) definitivno ne	Ima previše neželjenih dejstava. Nije dovoljno ispitana. Ne pruža odgovarajuću zaštitu.	e) ne smatram da su vakcine korisne, f) ne verujem Kriznom štabu		Preuzimanje odgovornosti proizvođača vakcina za sva neželjena dejstva. Isplata dgovarajuće odštete ako se neko razboli zbog vakcine.	Nepotpisivanje saglasnisti, već preuzimanje odgovornosti od strane proizviđača. Detaljnije ispitivanje i provera istih.	Vakcine treba da pruže dugoročniju i sveobuhvatniju zaštitu kao što na pr. pruža tetalpan. Miran si 10 godina.
2022-02-16 17:17:24	ženski	24	Srpska	da	državno	da	da		da	Period od 6 meseci Covid sertifikata je istekao, a Covid sertifikat mi je potreban zbog ulaska u operacionu salu.						Prvo odraditi analize antitela pacijentima, a tek nakon dobijenih rezultata objasniti ljudima zašto je bitna vakcinacija.
2022-02-23 12:41:21	ženski	22	Srpska	da	državno	ne					c) verovatno ne	a) sačekao/la bih kako bih se uverio/la da je vakcina bezbedna, te je možda primim kasnije, b) zabrinut/a sam zbog mogućih neželjenih dejstava vakcine, d) ne verujem da mi je potrebna vakcina	a) smatram da ne pripadam rizičnoj grupi, b) ne verujem da je virus KOVID-19 ozbiljna bolest, f) ne verujem Kriznom štabu
2022-02-24 00:59:34	ženski	38	Srpkinja	da	državno	ne					c) verovatno ne	a) sačekao/la bih kako bih se uverio/la da je vakcina bezbedna, te je možda primim kasnije
2022-02-24 21:10:05	muški	57	Srbin	da	državno	ne					a) definitivno da					Samo kompetentni i OZBILJNI ljudi iz te oblasti DA MOGU DA GOVORE NA NACIONALNOJ TV o temi vakcine.I bez skrivanja podataka.	Politiku lansirati na Mars
2022-03-07 14:12:39	ženski	45	Srpska	da	državno	da	da		da
2022-03-07 14:18:54	ženski	30	Srpska	da	državno	ne					a) definitivno da
2022-03-07 14:34:26	ženski	57	Srpska	da	državno	da	da		da	Zastita						Edukacija od mladih do treceg doba
2022-03-07 15:02:00	muški	43	Srpska	da	državno	da	da		da	Prevencija						Kontinuirana edukacije i borba protiv antivakserskih stavova
2022-03-07 15:05:49	ženski	33	Srpkinja	da	državno	da	da		da	Vec sam je primila, radi bolje zastite						Medijska paznja, primeri posledica prelezanog virusa kod vakcinisanih I nevakcinisanih ali ne teoretski nego iz zivota narodu priblizno	Zajednicki stav svih lekara o vakcinaciji I “mis pojavama “ posebno ginekologa
2022-03-08 19:55:35	ženski	29	srpkinja	da	državno	ne	ne		ne		c) verovatno ne	d) ne verujem da mi je potrebna vakcina	f) ne verujem Kriznom štabu, g) ne verujem u vakcine generalno
2022-03-08 19:58:28	ženski	38	Srbin	da	državno	ne	ne		ne		d) definitivno ne	b) zabrinut/a sam zbog mogućih neželjenih dejstava vakcine	c) već sam preležao virus KOVID-19, f) ne verujem Kriznom štabu	Manipulacija.	Nista.	Nemam predlog.
2022-03-08 19:59:17	ženski	53	Srpska	da	državno	da	da
2022-03-08 20:02:09	muški	63	Srbin	da	državno	da	da		ne								Iako sam primio dve doze,smatram da je prirodni imunitet najvazniji!
2022-03-08 20:07:08	ženski	41	Srpska	da	državno	da	da		da	Primila sam
2022-03-08 20:07:51	muški	48	Srbin	da	državno	da	da		da
2022-03-08 20:09:27	muški	41	Srpska	da	državno	da	da		da
2022-03-08 20:28:09	ženski	29	Srpska	da	državno	da	da		ne
2022-03-08 20:34:40	ženski	50	Srpska	da	državno	da	da		da	Primljena je već u skladu sa zdravstvenim preporukama						Pozitivne preporuke bez dvosmislenosti Jasan plan vakcinacije Pozivanje svakog pojedinca na vakcinaciju Veća participacija za nevakcinisane
2022-03-08 20:35:35	ženski	23	Srpska	da	državno	da	da		ne	Skoro sam preležala covid 19
2022-03-08 20:52:54	ženski	41	Srbska	da	državno	da	da		ne	Neću da je primim	d) definitivno ne	b) zabrinut/a sam zbog mogućih neželjenih dejstava vakcine	e) ne smatram da su vakcine korisne	Meni su više odmogle nego pomogle	Ništa	Nemam mišljenje	Ne
2022-03-08 20:53:45	muški	49	Srpska	da	državno	ne					d) definitivno ne	Ne verujem u vakcinu	e) ne smatram da su vakcine korisne
2022-03-08 20:57:38	muški	32	Srbin	da	državno	ne					d) definitivno ne	a) sačekao/la bih kako bih se uverio/la da je vakcina bezbedna, te je možda primim kasnije, b) zabrinut/a sam zbog mogućih neželjenih dejstava vakcine
2022-03-08 21:00:53	muški	37	Srpski	da	državno	da	da		da	Zdravlje	a) definitivno da	c) smatram da je vakcina potrebnija drugima nego meni		Verujem	Neželjena dejstva	Nemam ih	Ne
2022-03-08 21:02:22	ženski	45	Srpska	da	državno	da	da		ne		a) definitivno da
2022-03-08 21:12:12	muški	26	Srpska	da	državno	da	da		da	Već sam primio kako bih zaštitio sebe, ali i ostale.
2022-03-08 21:31:51	muški	46	Srbin	da	državno	da	da
2022-03-08 21:43:09	muški	49	Srbin	da	drugo	da	da		da	Posto ne zivim u Srbiji vec u drugoj drzavi u kojoj su obavezne vakcine za nesmetan rad u firmi...primio sam sve tri doze a isto tako to funkcionise besprekorno
2022-03-08 21:44:10	ženski	29	Srpkinja	da	državno	ne					d) definitivno ne	b) zabrinut/a sam zbog mogućih neželjenih dejstava vakcine			Da prodje bar jedno 20 godina da vidimo stvarno stanje stvari. Mnogo je kratak period da bi se ispitalo nesto sto se unosi u telo
2022-03-08 21:55:42	ženski	30	srpska	da	državno	ne	ne	Nisam vakcinisana.	ne	Nisam vakcinisana.	c) verovatno ne	Preležala sam covid 19 i imam veliki broj antitela.	c) već sam preležao virus KOVID-19	Verujem u imunizaciju.	Manje rekalmiranje istih na način kako se to do sad činilo.	Potrebni su nam kompetentni i relevantni stručnjaci koji bi na adekvatan način potvrdili argumente vezane za vakcinaciju.	Treba zabraniti komentarisanje i diskusiju o vakcinaciji (ne samo protiv covida 19) već generalno protiv svih bolesti, na društvenim mrežama jer o istim pišu laici i lica koja nemaju dodirnih tačaka sa medicinom, izazivajući strah i paniku, šireći dezinformacije medju građanima (naročito se odnosi na MMR vakcinu - mnoge mlade majke su onda u nedoumici kad pročitaju tako nešto).
2022-03-08 22:03:31	ženski	33	Srpska	da	državno	ne			ne		d) definitivno ne	d) ne verujem da mi je potrebna vakcina	b) ne verujem da je virus KOVID-19 ozbiljna bolest, d) koristim maske i druga preventivna sredstva, e) ne smatram da su vakcine korisne, f) ne verujem Kriznom štabu, g) ne verujem u vakcine generalno	Nedostatak javno dostupnih studija za vakcine kao i sve nuspojave vakcina. Cinjenica je da nus pojava ima, smrtnih ishoda nakon primljenih vakcina, nekad i teskih oboljenja nakon primljenih vakcina, i tice se svih vakcina generalno. Nedovoljno smo obavesteni i nemamo dovoljno izvora za informisanje.	Neka nauka dokaze da su zaista korisne, i neka nauka ukaze na sve, a onda mi da odaberemo, bez skrivenih nedostataka. Pravo na izbor mora da prati apsolutna naucno potkrepljena istina a ne pretpostavke i nedovoljno proverene cifre.	Neka svaka vakcina uvek bude prezentovana sa svim prednostima i svim manama i neka svako zna u koji rizik se upusta spram svog organizma i imuniteta, tek tada se moze reci da je moguce doneti nekakvu odluku o nasem zdravlju i zastiti.	Mislim da se vakcinacijom nece resiti porast broja obolelih od raznih bolesti. Kvalitet zivota, i nasa zagadjena sredina je zapravo koren problema. Vakcine su samo jedno od sredstava za prevenciju koje se pokazalo i ne bas tako delotvorno kao sto je predstavljeno javnosti.
2022-03-08 22:05:33	ženski	29		da	državno	ne					d) definitivno ne		c) već sam preležao virus KOVID-19, f) ne verujem Kriznom štabu	Ovi sto su zasticeni nisu zasticeni. Jer mogu opet da obole od covid. Znaci i ja treba da se zastitim da bi ovi sto su zasticeni bili zasticeni! Ako neko malo mucne glavom ,i ne dozvoli da mu mediji natrpavaju nesto u mozak da mora jer to tako mora znaci ne mora. Nisam protiv vakcine generalno ali jesam protiv masovnog trovanja stanovnistva. Zasto niko javno nije procitao pravi sastav vakcine??? …
2022-03-08 22:09:40	ženski	34	Kosova	ne	drugo	ne	ne	nema	ne	live gay	c) verovatno ne	c) smatram da je vakcina potrebnija drugima nego meni	c) već sam preležao virus KOVID-19, d) koristim maske i druga preventivna sredstva
2022-03-08 22:16:10	muški	37	СРБИН	da	državno	da	da		da	због сигурности, мада и после друге дозе после два месеца поново сам био ковид позитиван мада са лакшим симптомима						достављање тачних података око вакцина, колико су трајала испитвања и каква сигурност од нежељених ефеката може вакцина да произведе. Као и да то презентују признати стручњаци, а не лобисти фармацетких кућа.
2022-03-08 22:29:52	ženski	25	Srbija	da	državno	ne	ne	Nisam primila nijednu vakcinu	ne	X	d) definitivno ne	b) zabrinut/a sam zbog mogućih neželjenih dejstava vakcine	g) ne verujem u vakcine generalno	Konkretno, ne verujem u vakcinu koja "pruza zastitu od kovida 19", razlozi su nedovoljna ispitanost iste, strah od nezeljenih dejstva, mogucih posledica koje snosimo na osnovu licne odgovornosti, niko nam ne moze garantovati nus pojave kroz odredjeni vremenski period.	Apsolutno nista, jer za sada ne postoji nijedan jak argument, nijedna adekvatna strucna ispitanost, totalno nepoverenje i nedovoljna strucnost naseg zdravstvenog sistema, koji najvise treba da stiti stanovnisto Republike Srbije, a ne zdravstvo stranih drzava. Mislim da kod nas generalno zdravstveni sistem tone, sto je najgore bez bilo kakve nade za oporavak i poboljsanje istog.	Povecanje strucnog kadra u zdravstvenom sistemu, uvodjenje konstantnog usavrsavanja zdravstvenih radnika, posebno onih koji rade presudna istrazivanja u laboratorijama , ciji propusti mogu imati nesagledive posledice po ljudske zivote. Ovo je globalni problem, koji nije vezan samo za trenutnu pandemiju, vec za sve one koje predstoje	Ne
2022-03-08 22:36:43	ženski	46	Srbija	da	privatno	da	da		da	preporuka struke
2022-03-08 23:07:05	muški	42	Srpska	da	državno	da	da		da	Kao lekar poznajem ulogu i značaj buster doze
2022-03-08 23:43:32	muški	27	srbin	da	privatno	ne					d) definitivno ne	b) zabrinut/a sam zbog mogućih neželjenih dejstava vakcine, d) ne verujem da mi je potrebna vakcina	e) ne smatram da su vakcine korisne, f) ne verujem Kriznom štabu	Lekari ne mogu da potvrde da je vakcina korisna, i ista moze izazvati nezeljena dejstva, a posebno imajuci u vidu da ljudi u velikom stepenu umiru iako su vakcinisani dozama.	Kada bi se svi lekari/naucnici slozili po pitanju njene koristi.
2022-03-09 00:20:01	ženski	25	Srpska	da	državno	ne	ne		ne		d) definitivno ne		c) već sam preležao virus KOVID-19, e) ne smatram da su vakcine korisne, f) ne verujem Kriznom štabu		Ne menjam misljenje
2022-03-09 01:22:32	ženski	37	Srpska	da	državno	ne					c) verovatno ne	b) zabrinut/a sam zbog mogućih neželjenih dejstava vakcine	c) već sam preležao virus KOVID-19, d) koristim maske i druga preventivna sredstva, e) ne smatram da su vakcine korisne, f) ne verujem Kriznom štabu, g) ne verujem u vakcine generalno	Smatram da su neproverljive.	Da mi drzava garantuje da je to dobra vakcina i da ne postoje nezeljenih dejstva.I da primajući nju zaista cuvam sebe a i ostale iz mog okruženja.	Više konketnih proverenih informacija.	Ne
2022-03-09 01:47:58	ženski	19	srpska	da	državno	ne	ne	/	ne	/	d) definitivno ne	b) zabrinut/a sam zbog mogućih neželjenih dejstava vakcine, d) ne verujem da mi je potrebna vakcina	e) ne smatram da su vakcine korisne, g) ne verujem u vakcine generalno	napravljena je previše brzo čemu toliko teranje i uslovljavanje gradjana da se vakcinišu	ništa	/	/
2022-03-09 03:54:42	ženski	27		da	državno	ne					d) definitivno ne	d) ne verujem da mi je potrebna vakcina	a) smatram da ne pripadam rizičnoj grupi, c) već sam preležao virus KOVID-19		Bukvalno ništa. Smatram da vakcina ne pomaže previše, zbog toga što znam puno ljudi koji su primili sve neophodne vakcine, a imali covid 19 koji su jedva pobedili. Pritom, svi su pre vakcine bili zdravi, barem je na to ukazivala krvna slika budući da su dobrovoljni davaoci krvi. I naravno da znam da vakcine ne služe kao potpuna zaštita od virusa.	Nejasno je zašto je politika vakcinisanja takva da je bazirana na onom "Mora, mora!" i zašto se preti raznim scenarijima.
2022-03-09 04:44:55	ženski	24	Srpska	da	državno	ne					d) definitivno ne	d) ne verujem da mi je potrebna vakcina	c) već sam preležao virus KOVID-19, f) ne verujem Kriznom štabu
2022-03-09 04:48:56	ženski	30	Srpska	da	državno	ne					d) definitivno ne	d) ne verujem da mi je potrebna vakcina	c) već sam preležao virus KOVID-19		Kada bi cela igra bila istinito prikazana, onda se genske terapije ne bi predstavljale kao vakcine, cije cemo posledice dugo trpeti.	Zasto bi bila potrebna bolja politika vakcinacije?
2022-03-09 06:33:53	ženski	45	Srpsko	da	državno	ne	ne		ne		c) verovatno ne	b) zabrinut/a sam zbog mogućih neželjenih dejstava vakcine	a) smatram da ne pripadam rizičnoj grupi, f) ne verujem Kriznom štabu		Ne ozbiljnost, sve liči na ozbiljnu trgovinu, sama treba da biram još i da mi plate koju ću primiti, ljudi koje poznajem a primili su vakcinu ne vidim da su bolje prošli od mene.....	Promeniti pristup	Ne
2022-03-09 07:37:13	ženski	27	Srpska	da	državno	ne	ne	/	ne	/	d) definitivno ne	c) smatram da je vakcina potrebnija drugima nego meni	a) smatram da ne pripadam rizičnoj grupi, c) već sam preležao virus KOVID-19, f) ne verujem Kriznom štabu	Smatram da su vakcine korisne.	Da se WHO i lekari bave lečenjem bolesti, a ne biznisom.	Da se WHO i lekari bave lečenjem bolesti, a ne biznisom. Izlečenje ljudi kao najviši cilj, a ne zarada.	/
2022-03-09 07:42:47	ženski	39	Srpska	da	državno	da	da		ne
2022-03-09 08:06:37	ženski	26	Srpkinja	da	državno	da	da		da	Vec sam primila trecu dozu vakcine kao dodatnu zastitu od Covid-19 virusa.						Smatram da je od izuzetnog znacaja da se stanovnostvo informise na relevantne nacine o znacaju vakcinacije uopste, ne samo i iskljucivo vakcine protiv virusa Covid-19.	Verujem da bi smanjenjem sirenja dezinformacija na nacionalnim frekvencijama dalo velike rezultate.
2022-03-09 08:45:58	ženski	45	Srpska	da	državno	da	da		da	COVID propusnica						Ne znam	Ne
2022-03-09 09:01:36	ženski	44	Srpska	da	državno	da	da		ne							Da lekari kazu posteno da ne znaju o toj vakcini i o kovidu gotovo nista, ali da je ponudjena vakcina trenutno jedina opcija koju imaju.
2022-03-09 09:46:44	ženski	38	srpska	da	državno	ne					d) definitivno ne	a) sačekao/la bih kako bih se uverio/la da je vakcina bezbedna, te je možda primim kasnije, b) zabrinut/a sam zbog mogućih neželjenih dejstava vakcine, Dok traje pandemija vakcinisanje pomaze mutaciji virusa, vakcinisanje se radi kad prodje epidemija	c) već sam preležao virus KOVID-19, e) ne smatram da su vakcine korisne, U prethodnom sam pomenula glavne razloge, plus prelezala sam boledt 3pyta i imam pritofni imunitet	Verujem u vakcine, ali ne u one napravljene za par meseci, posebno sto se nikada ne radi vakcinacija dok traje zaraza vec kad prodje. To pospesuje mutacije virusa i onda duze traje zaraza	Nista u ovom slucaju, objasnila sam u prethodnom pitanju. Imam i prirodni imunitet i to je jace nego vakcina	Da se radi vakcinacija kada je stvarno potrebna i moguca a ne po svaku cenu. Da se prate dobre prakse drugih zemalja, da ne pristajemo na test vakcine pre svih... Da se dize svest ljudi i znanje o potreni vakcinacije a ne zloupotrebljavati strah i paniku za promociju iste.	Da se vratimo na prethodne vakcinacije, odnosno nacine, prakse koje decenijama funkcionisu i da se promovise prirodni imunitet.
2022-03-09 10:41:37	muški	29	Srbin	ne		ne			ne		d) definitivno ne	Imam iskustva u ličnom okruženju o posledicama vakcinacije	a) smatram da ne pripadam rizičnoj grupi, c) već sam preležao virus KOVID-19		Mogućnost slobodnog izbora, efikasnost vakcine	Sloboda izbora
2022-03-09 10:52:38	ženski	24	Srpska	da	državno	ne	ne		ne		d) definitivno ne	d) ne verujem da mi je potrebna vakcina	c) već sam preležao virus KOVID-19, e) ne smatram da su vakcine korisne	Nisu ispitane	Da vidim njihovo delovanje
2022-03-09 11:37:51	ženski	32	Srpkinja	da	državno	da	da		da	Ukoliko bude neophodno, zavisno od epidemioloških okolnosti						Razvijanje svesti ljudi o graničenju međusobnih prava, da štiteći svoje pravo ne smemo narušavati pravo drugih, kao i to da svako pravo trpi izuzetke posebno u pogledu opste dobrobiti drustva. Razgraničiti vrednovanje prava izbora pojedinca od situacija kada takav izbor na širem nivou, predstavlja povredu prava drugih. Usklađivanje Pravilnika o obaveznoj inunizaciji stanovništva protiv zaraznih b…
2022-03-09 11:47:57	ženski	40	Srpska	da	državno	ne	ne		ne		d) definitivno ne	b) zabrinut/a sam zbog mogućih neželjenih dejstava vakcine, d) ne verujem da mi je potrebna vakcina	b) ne verujem da je virus KOVID-19 ozbiljna bolest, d) koristim maske i druga preventivna sredstva, f) ne verujem Kriznom štabu
2022-03-09 11:58:16	ženski	38	Srpkinja	da	državno	da	da		da
2022-03-09 11:58:35	muški	32	Srpska	da	državno	ne	ne		ne		b) verovatno da	d) ne verujem da mi je potrebna vakcina	c) već sam preležao virus KOVID-19
2022-03-09 12:00:51	muški	32	Srbin	da	državno	da	da		da	Savet doktora
2022-03-09 12:04:01	ženski	26	srpsko	da	državno	da	da		ne	Prelezala sam covid19 i primila dve doze, smarram da treca doza nije neophodna u slucaju kada sam vev prelezala covid19.
2022-03-09 12:05:06	muški	30	Srbin	da	državno	da	da		da								Ne
2022-03-09 12:06:01	muški	29		da	državno	da	da		ne							Podizanje opste svesti o zdravlju ljudi
2022-03-09 12:06:06	ženski	25	srpska	da	državno	ne	ne		ne		d) definitivno ne	d) ne verujem da mi je potrebna vakcina	e) ne smatram da su vakcine korisne, g) ne verujem u vakcine generalno	Sve vise vakcina, sve vise bolesnih ljudi	Nista	Nemam ih	Da. Drzavi i lekarima zdravi ljudi su beskorisni. Toliko.
2022-03-09 12:07:29	muški	24	Srbij	da	državno	ne	ne		ne		d) definitivno ne	d) ne verujem da mi je potrebna vakcina	Veruje u sopstveni organizam.		Nema promene misljenja.
2022-03-09 12:07:32	ženski	33	Srpkinja	da	državno	ne					a) definitivno da					Potrebno je da lekari usvoje jedinstveni stav u vezi sa vakcinacijom. Veliko nepoverenje stanovnoštva izaziva to što su neki lekari protiv vakcinacije.
2022-03-09 12:08:01	ženski	16	Srpkinja	da	državno	da	da		ne	Maloletno lice
2022-03-09 12:08:07	ženski	28	Srpska	da	državno	da	da		ne
2022-03-09 12:09:44	ženski	40	Srpska	da	državno	ne					d) definitivno ne	d) ne verujem da mi je potrebna vakcina	e) ne smatram da su vakcine korisne	Nema mi logike da primis vakcinu i i dalje mozes da dobijes kovid i mozes da zarazis druge. Znaci vakcinisani su u istoj poziciji kao i nevakcinisani. Prica o laksem obliku je prazna, jer poznajem mnoge nevakcinisane koji su prosli lakse, kao i neke vakcinisane koji su zavrsili u bolnici. Znaci sve je do stanja organizma i imuniteta, ne do vakcine.	Ne menjam misljenje	Da se postuje slobodna volja ljudi. Ko hoce neka se vakcinise, ko nece ne mora. Bez sankcionisanja i restrikcija za nevakcinisane
2022-03-09 12:09:50	muški	31	Srpsko	da	privatno	da	da	N/a	da	Produzena zastita imuniteta				N/a
2022-03-09 12:17:42	muški	25	Srbin	da	državno	da	da		ne
2022-03-09 12:19:56	ženski	26		da	državno	ne					d) definitivno ne	c) smatram da je vakcina potrebnija drugima nego meni	c) već sam preležao virus KOVID-19
2022-03-09 12:22:42	muški	20	RS	da	državno	da	da		da	Radi jačeg imuniteta i prevencije loše kliničke slike usled oboljenja.							Ne.
2022-03-09 12:23:22	ženski	27	Srpkinja	da	državno	ne					d) definitivno ne	d) ne verujem da mi je potrebna vakcina	b) ne verujem da je virus KOVID-19 ozbiljna bolest, d) koristim maske i druga preventivna sredstva, f) ne verujem Kriznom štabu		Da su bili jasniji po pitanju vakcinacije tj. kao sto majka ne moze da napusti porodiliste dok beba ne primi vakcinu, takav stav su trebali da imaju od samog pocetka Covid vakcinacije.	Da budu jednoglasni.
2022-03-09 12:27:47	ženski	29	Srpkinja	da	državno	da	da		ne	Zato što se svuda u svetu ukidaju bilo kakve mere i korona se deklariše kao grip
2022-03-09 12:28:59	ženski	16	Srpska	da	državno	ne	ne				c) verovatno ne	b) zabrinut/a sam zbog mogućih neželjenih dejstava vakcine
2022-03-09 12:32:27	muški	54	Srpska	da	državno	da	da		da	Zdravstvena sigurnost						Medijska promocija
2022-03-09 12:32:28	ženski	51	Srpska	da	državno	ne					c) verovatno ne	b) zabrinut/a sam zbog mogućih neželjenih dejstava vakcine			Period ispitivanja iste	Treba napraviti vakcinu	Ne
2022-03-09 12:36:46	ženski	24	Srbija	da	državno	da	da		ne				a) smatram da ne pripadam rizičnoj grupi, d) koristim maske i druga preventivna sredstva
2022-03-09 12:37:02	muški	43	Srbin	da	državno	da	da		da	Razlog zdravstvene sigurnosti						Veći stepen informisanosti i veća propaganda	Ne
2022-03-09 12:42:35	muški	46	srBin	da	državno	da	da		ne			d) ne verujem da mi je potrebna vakcina	c) već sam preležao virus KOVID-19, f) ne verujem Kriznom štabu
2022-03-09 12:43:37	muški	24	Srbin	da	državno	ne					d) definitivno ne	b) zabrinut/a sam zbog mogućih neželjenih dejstava vakcine			Još 30 godina istrazivanja ove vakcine	Ne terati ljude na vakcinaciju
2022-03-09 12:47:12	muški	54	Srbin	da	državno	ne					c) verovatno ne	a) sačekao/la bih kako bih se uverio/la da je vakcina bezbedna, te je možda primim kasnije, b) zabrinut/a sam zbog mogućih neželjenih dejstava vakcine	d) koristim maske i druga preventivna sredstva, f) ne verujem Kriznom štabu		Otvoreni dijalog lekara (bez političara) koji su za i protiv vakcine, objavljivanje statističkih podataka o broju obolelih izlečenih i preminulih vakcinisanih (posle koliko doza) i nevakcisanih, sa i bez pridruženih bolesti.	Objavljivanje preciznih podataka o stepenu oboljenja među vakcinisanom i nevakcinisanom populacijom svih uzrasta.	Smeta mi činjenica da se mogu vakcinisati nekom od ponuđenih vakcina po svom izboru (uz potpisivanje saglasnosti) nakon jednog laganog razgovora sa lekarom, bez uvida moj zdravstveni karton. Koliko našu državu košta projekat vakcinacije?
2022-03-09 13:01:18	muški	18	Srpska	ne		ne					d) definitivno ne	b) zabrinut/a sam zbog mogućih neželjenih dejstava vakcine, d) ne verujem da mi je potrebna vakcina		-Nesigurnost u ispravnost iste -Pojava neželjenih dejstava - Jednostavno smatram da mi nije potrebna	Apsolutno ništa.
2022-03-09 13:03:24	ženski	46	Srpska	da	državno	ne					d) definitivno ne	b) zabrinut/a sam zbog mogućih neželjenih dejstava vakcine	a) smatram da ne pripadam rizičnoj grupi, c) već sam preležao virus KOVID-19, f) ne verujem Kriznom štabu		Promena zakona za slobodan izbor vakcinacije! Sve sto je prisilno , stvara odbojnost i nepoverenje!	Slobodan izbor vakcinacije, pogotovo za deciji karton vakcinacije koji je uslovljujući i prisilan!
2022-03-09 13:07:31	muški	26	Srbin	da	državno	da	da		da
2022-03-09 13:10:33	muški	45	Srbin	da	državno	da	da		ne	kajem se sto sam primio bilo koju dozu				Ja apsolutno verujem u vakcinu ali ovo nije vakcina. Vakcina sprecava dobijanje bolesti, a ovo sto zovu vakcina niko ne zna sta radi i cemu sluzi.	Proizvodnja domace vakcine koja sprecava zarazavanje covidom.	Ponuditi vakcinu.
2022-03-09 13:17:42	muški	42	Srbin	da	državno	da	da		da	Već sam primio treću dozu						Više obaveštavanja o razlozima i dejstvu vakcinacije
2022-03-09 13:17:55	ženski	29	Srpkinja	da	državno	ne			ne		d) definitivno ne	d) ne verujem da mi je potrebna vakcina	e) ne smatram da su vakcine korisne, f) ne verujem Kriznom štabu, g) ne verujem u vakcine generalno	Smatram da su podmukle i apsolutno nepotrebne	Nikada ništa. S tim što bi moje generalno mišljenje o tome verovatno bilo manje isključivo ukoliko bi se smanjio pritisak sa druge strane, kao i zabrana određenim proizvođačima da ih proizvode. Na prvom mestu je Fajzer.		Neophodno je što pre ostaviti ljude na miru. Verujmo prirodi, njenim zakonima i koristimo resurse iz iste. U tome leži jedno jedino rešenje za ovu situaciju.
2022-03-09 13:56:05	ženski	20	Srpsko	da	državno	da	da			Već sam primila treću dozu
2022-03-09 14:19:20	muški	41	Srbin	da	državno	da	da		da	Posao, moram biti kvalifikovan za putovanja						vise transparetnosti, manje drame i hvalospeva	ne
2022-03-09 14:27:01	muški	41	Bugarska	da	privatno	da	da		ne
2022-03-09 14:51:45	muški	26	Srbin	da	državno	da	da		da	Putovanje	a) definitivno da						Smatram da vakcinacijs treba da bude obavezna, pravo izbora u slučaju pandemije nije realno. Kao što svi moraju da se pridržavaju propisanih antikovid mera, tako i vakcinacija treba da bude obavezna.
2022-03-09 15:35:23	ženski	43	Hrvatica	da	državno	ne	ne		ne		d) definitivno ne	a) sačekao/la bih kako bih se uverio/la da je vakcina bezbedna, te je možda primim kasnije, b) zabrinut/a sam zbog mogućih neželjenih dejstava vakcine	b) ne verujem da je virus KOVID-19 ozbiljna bolest, c) već sam preležao virus KOVID-19, e) ne smatram da su vakcine korisne, f) ne verujem Kriznom štabu
2022-03-09 15:55:51	ženski	27	Srpkinja	da	državno	ne					b) verovatno da	a) sačekao/la bih kako bih se uverio/la da je vakcina bezbedna, te je možda primim kasnije	c) već sam preležao virus KOVID-19
2022-03-09 17:42:15	ženski	44	Srpska	da	državno	da	da		ne					Mislim da nisu dovoljno ispitane,i mislim da se njihova efikasnost ispitivala kroz ovaj virus	Dovoljna ispitanost	Da medicina,odnosno struka prvenstveno i samo ona stane iza ovih vakcina i da politika ne učestvuje u rukovođenju epidemije	Ne
2022-03-09 17:53:37	ženski	45	Srpska	da	državno	da	da	/	da	Vec sam primila						Strožije sankcije za širenje lažnih vesti o štetnosti vakcinacije	Ne
2022-03-09 18:17:33	muški	17	Srbin	da	državno	ne	ne		ne		c) verovatno ne	a) sačekao/la bih kako bih se uverio/la da je vakcina bezbedna, te je možda primim kasnije, b) zabrinut/a sam zbog mogućih neželjenih dejstava vakcine			Dokazani rezultati i ne postojanje neželjenih dejstava.	Manje promovisanje na televizijama i elektronskim medijima.
2022-03-09 18:22:37	ženski	32	srpska	da	državno	da	da		da							Više konkretnih istraživanja o delotvornosti vakcine
2022-03-09 18:32:51	ženski	40	Srpska	da	državno	da	da										Ja nisam protiv vakcine
2022-03-09 18:54:44	muški	51	Srbin	da	državno	da	da		da	dodatna zastita
2022-03-09 20:03:05	muški	27	Srbin	da	državno	ne					d) definitivno ne	b) zabrinut/a sam zbog mogućih neželjenih dejstava vakcine	a) smatram da ne pripadam rizičnoj grupi, f) ne verujem Kriznom štabu		Da vakcina stvarno i stiti ljude koji su je primili.	Manje pritiska.
2022-03-10 07:26:23	muški	48		da	državno	da	da		da	Preporuka odabranog lekara.						Edukacija.
2022-03-10 09:00:39	ženski	29	Srpska	da	državno	da	da		da	Zbog posla						Nemojte uslovljavati narod..
2022-03-10 12:00:06	muški	23	srpska	da	državno	da	da		da	Već primio
2022-03-10 13:18:27	muški	20	Srbin	da	državno	ne	ne		ne		d) definitivno ne	d) ne verujem da mi je potrebna vakcina	b) ne verujem da je virus KOVID-19 ozbiljna bolest, e) ne smatram da su vakcine korisne, f) ne verujem Kriznom štabu
2022-03-10 13:18:54	ženski	20	srpsko	da	državno	ne					d) definitivno ne	nije potrebna ni meni, a ni drugima	c) već sam preležao virus KOVID-19, e) ne smatram da su vakcine korisne, f) ne verujem Kriznom štabu, g) ne verujem u vakcine generalno
2022-03-10 13:18:56	muški	20	Srbin	da	državno	da	da		da	Primio sam dve
2022-03-10 13:19:07	ženski	20	Srpkinja	da	državno	da	da	Primila sam obe	da	Za svaki slučaj		Vakcinisana sam	Vakcinisana sam
2022-03-10 13:19:11	ženski	20	Srpsko	da	državno	ne	ne		ne		d) definitivno ne	b) zabrinut/a sam zbog mogućih neželjenih dejstava vakcine	c) već sam preležao virus KOVID-19, g) ne verujem u vakcine generalno	Neispitanost.			Ne
2022-03-10 13:19:41	ženski	20	Srpkinja	da	državno	ne					d) definitivno ne	b) zabrinut/a sam zbog mogućih neželjenih dejstava vakcine	e) ne smatram da su vakcine korisne	zaraza kovid virusom i nakon primljenih vakcina, kao i smrtni slucajevu
2022-03-10 13:19:45	muški	20	Srbija	da	državno	ne					d) definitivno ne	d) ne verujem da mi je potrebna vakcina	e) ne smatram da su vakcine korisne, f) ne verujem Kriznom štabu, g) ne verujem u vakcine generalno
2022-03-10 13:19:45	ženski	21	Srpkinja	da	državno	ne					d) definitivno ne	b) zabrinut/a sam zbog mogućih neželjenih dejstava vakcine	e) ne smatram da su vakcine korisne	Zaraza virusom i nakom primanja vakcine, smrtni na slycajevi…	Nista
2022-03-10 13:20:17	ženski	21	Srpkinja	da	državno	da	da		ne							Bolja ispitanost vakcine	Ne
2022-03-10 13:20:22	ženski	20	Srpski	da	državno	ne	ne	Nisam primila ni jednu.	ne		d) definitivno ne	Nije mi potreba, jer smatram da je korona virus kao i svaki drugi virus.	b) ne verujem da je virus KOVID-19 ozbiljna bolest		Ne bih menjala mišljenje.	Nemam predloge, jer me i ne zanima.	Ne.
2022-03-10 13:20:28	ženski	20	Srpsko	da	državno	ne					c) verovatno ne	Nadamo se prestanku korone ubrzo
2022-03-10 13:20:34	ženski	20	Srpsko	da	državno	ne					d) definitivno ne	d) ne verujem da mi je potrebna vakcina	g) ne verujem u vakcine generalno	Nedovoljna ispitanost	Nista	Detaljnije ispitivanje nezeljenih dejstava	Ne
2022-03-10 13:21:12	ženski	21	Srbija	da	državno	ne					d) definitivno ne	d) ne verujem da mi je potrebna vakcina	g) ne verujem u vakcine generalno	Ni na koji način se do sada nisu korisno pokazale
2022-03-10 13:21:16	ženski	20	Srpsko	da	državno	ne					c) verovatno ne	d) ne verujem da mi je potrebna vakcina	c) već sam preležao virus KOVID-19, f) ne verujem Kriznom štabu		Nista
2022-03-10 13:21:23	ženski	21	srpkinja	da	državno	da	da		ne						Da veliki broj ljudi pokaže da je pretrpeo loše dejstvo od strane vakcine	Edukacija ljudi koji ne znaju mnogo o vakcinaciji
2022-03-10 13:22:34	muški	20	Srpska	da	državno	ne					d) definitivno ne	b) zabrinut/a sam zbog mogućih neželjenih dejstava vakcine	e) ne smatram da su vakcine korisne, f) ne verujem Kriznom štabu
2022-03-10 13:23:57	muški	20	Srbin	da	privatno	da	da		da	Razlog je da bih se zastitio od korona virusa, da ne ugrozim sebe I druge, I da bi se nastavio normalan zivot.						Moj predlog je da se ponude neke beneficije ljudima koji se vakcinisu, medjutim, one ne bi trebale da budu tolike da stvaraju jaz medju ljudima.	Preporucujem vakcinaciju (I sam sam se vakcinisao). Vakcinacija je dala mnoge uspesne efekte. Ali postujem i one koji se ne vakcinisu. Mozda ima ljudi koji iz zdravstvenih razloga ne mogu da se vakcinisu, ili imaju dodatnih problema oko vakcinacije. Sve koje bih mogao posavetovacu uvek da prime vakcinu, ali ne zelim da nipodastavam ni ljude koji se iz nekog odredjenog razloga (smislenog) nece vak…
2022-03-10 13:23:59	ženski	20	Srpska	da	državno	ne					b) verovatno da	a) sačekao/la bih kako bih se uverio/la da je vakcina bezbedna, te je možda primim kasnije
2022-03-10 13:24:02	ženski	20	Srpska	da	državno	ne					d) definitivno ne	b) zabrinut/a sam zbog mogućih neželjenih dejstava vakcine, d) ne verujem da mi je potrebna vakcina	a) smatram da ne pripadam rizičnoj grupi, e) ne smatram da su vakcine korisne	-Zato što i vakcinisani takodje mogu da obole.	-Moj odgovor je konacan.”ne želim da se vakcinišem”
2022-03-10 13:24:41	ženski	20	Srpkinja	ne		ne	ne		ne		d) definitivno ne	a) sačekao/la bih kako bih se uverio/la da je vakcina bezbedna, te je možda primim kasnije, b) zabrinut/a sam zbog mogućih neželjenih dejstava vakcine	f) ne verujem Kriznom štabu		Sigurna potvrda lekara, bez političkog pritiska i dokaz o njenom pozitivnom dejstvu	Nemam ih	Ne
2022-03-10 13:25:17	ženski	20	Srpsa	da	državno	da	da		da	Zbog jačanja imuniteta i u slučaju mutiranja virusa						Zabrana nestručnim licima da zadiru u pitanja o vakcinama, već da se time bave samo lekari
2022-03-10 13:25:17	ženski	20	Srpsko	da	državno	ne					d) definitivno ne	d) ne verujem da mi je potrebna vakcina	Virus kovid 19 je vec postao kao obican virus, mislim da vec krece sve normalno i smatram da nema potrebe da je sada primim kad vec nisam do sada	Definitivno da su korisne, nema protiv toga ništa, ali ja lično ne bih da primim	Ukoliko sve države zahtevaju vakcinu za ulazak u tu državu	Nemam predlog	Ne
2022-03-10 13:40:54	ženski	28	Srpska	da	državno	da	da		da	Bolja zaštita						Da stručnjaci iz oblasti medicine više popularizuju vakcinaciju.
2022-03-10 13:49:45	ženski	37	M *	da	državno	da	da						c) već sam preležao virus KOVID-19
2022-03-10 14:05:40	muški	27	Srpska	da	državno	ne	ne		ne		c) verovatno ne	a) sačekao/la bih kako bih se uverio/la da je vakcina bezbedna, te je možda primim kasnije, b) zabrinut/a sam zbog mogućih neželjenih dejstava vakcine			Manje politike u vezi sa tim	Bolje vakcine
2022-03-10 14:19:54	muški	31	Srbin	da	državno	da	da		ne	I dve su bile previše.				Generalno verujem u vakcine		Vakcinacija kao i sve u vezi ličnog zdravlja mora biti slobodan izbor pojedinca	Ulagati u domaću nauku, kako bi u budućnosti sami pronalazili i izrađivali vakcine, a ne da ih kao poslednji slepci samo pakujemo po tuđem "receptu".
2022-03-10 14:41:07	ženski	24	Srpkinja	da	državno	ne					c) verovatno ne	d) ne verujem da mi je potrebna vakcina	a) smatram da ne pripadam rizičnoj grupi, c) već sam preležao virus KOVID-19			Ne vakcinisati osobe koje su preležale COVID-19, jer je prirodni imunitet uvek jači od veštačkog. Predlagati vakcine samo rizičnim grupama. Ukinuti zelene sertifikate koji nemaju nikakvu svrhu sem drušvene segregacije, jer virus mogu preneti i osobe koje su vakcinisane. Obustaviti primenu svih vakcina protiv COVID-19 izuzev mrtve vakcine, zbog dokazanih ozbiljnih neželjenih efekata.
2022-03-10 14:52:14	muški	36	Srbin	da	državno	da	da		ne	Već sam primio
2022-03-10 14:54:46	muški	21	Srbin	da	državno	ne	ne		ne		c) verovatno ne	a) sačekao/la bih kako bih se uverio/la da je vakcina bezbedna, te je možda primim kasnije	f) ne verujem Kriznom štabu
2022-03-10 14:55:35	muški	29	Srbin	da	državno	da	da		da	Kada sam primio dve, primicu i treću, verujem da pomaze u novim sojevima					Više strucnih i pouzdanih informacija	Bolja informisanost gradjana	Ne
2022-03-10 14:55:51	ženski	23	Srpkinja	da	državno	ne					d) definitivno ne	d) ne verujem da mi je potrebna vakcina	a) smatram da ne pripadam rizičnoj grupi, b) ne verujem da je virus KOVID-19 ozbiljna bolest, c) već sam preležao virus KOVID-19, d) koristim maske i druga preventivna sredstva
2022-03-10 14:56:35	ženski	21	Srpska	da	državno	ne					c) verovatno ne	a) sačekao/la bih kako bih se uverio/la da je vakcina bezbedna, te je možda primim kasnije, d) ne verujem da mi je potrebna vakcina	d) koristim maske i druga preventivna sredstva, e) ne smatram da su vakcine korisne	Ne verujem iz razloga sto smatram da nije moguce zs toliko kratko vreme stvoriti vakcinu koja je efikasna i koja je bezbedna	Nista
2022-03-10 14:57:50	ženski	33	Srpska	da	državno	ne	ne		ne		c) verovatno ne	b) zabrinut/a sam zbog mogućih neželjenih dejstava vakcine			Mamje kontradiktornosti u javnosti
2022-03-10 15:03:22	ženski	22	Srpkinja	da	državno	ne					d) definitivno ne	Smućkana je brže nego koktel i niko mi je ne preporučuje	b) ne verujem da je virus KOVID-19 ozbiljna bolest, c) već sam preležao virus KOVID-19, e) ne smatram da su vakcine korisne, f) ne verujem Kriznom štabu		Ništa.
2022-03-10 15:03:30	ženski	21	Srpkinja	da	državno	ne	ne		ne		d) definitivno ne	d) ne verujem da mi je potrebna vakcina	e) ne smatram da su vakcine korisne		Nista
2022-03-10 15:07:08	muški	29	Srpska	da	državno	da	da	/	da	Ističe se veća efikasnost i delotvornost u odnosu na primljene dve doze.				/	/	Potrebno je organizovati diskusije i promotivne aktivnosti od strane eminentnih stručnjaka iz oblasti virusologije i epidemiologije.	/
2022-03-10 15:09:39	ženski	22	Srpkinja	da	državno	ne					d) definitivno ne	b) zabrinut/a sam zbog mogućih neželjenih dejstava vakcine
2022-03-10 15:12:22	muški	33	Srbin	da	državno	ne	ne		ne		d) definitivno ne	b) zabrinut/a sam zbog mogućih neželjenih dejstava vakcine
2022-03-10 15:14:09	ženski	23		da	državno	da	da		da
2022-03-10 15:14:53	muški	27	Srbin	da	državno	da	da									Nemam novih predloga	Ne
2022-03-10 15:17:25	ženski	22	Srpkinja	da	državno	ne	ne		ne		c) verovatno ne	b) zabrinut/a sam zbog mogućih neželjenih dejstava vakcine	e) ne smatram da su vakcine korisne
2022-03-10 15:25:36	ženski	20	Srpska	da	državno	ne					c) verovatno ne	c) smatram da je vakcina potrebnija drugima nego meni	a) smatram da ne pripadam rizičnoj grupi, c) već sam preležao virus KOVID-19, d) koristim maske i druga preventivna sredstva
2022-03-10 15:38:30	ženski	22	Srpkinja	ne	drugo	ne	ne		ne		d) definitivno ne	d) ne verujem da mi je potrebna vakcina	g) ne verujem u vakcine generalno	Nisu sigurne	Nista		Ne
2022-03-10 15:47:12	ženski	21	Srpkinja	ne	drugo	ne	ne		ne		d) definitivno ne	d) ne verujem da mi je potrebna vakcina	f) ne verujem Kriznom štabu, g) ne verujem u vakcine generalno				Ne
2022-03-10 15:50:16	ženski	19	Srpska	da	državno	ne	ne		ne		d) definitivno ne	b) zabrinut/a sam zbog mogućih neželjenih dejstava vakcine	e) ne smatram da su vakcine korisne		Nista		Ne
2022-03-10 15:54:18	ženski	23	Srpkinja	ne		ne	ne		ne		b) verovatno da	a) sačekao/la bih kako bih se uverio/la da je vakcina bezbedna, te je možda primim kasnije	d) koristim maske i druga preventivna sredstva
2022-03-10 15:54:47	ženski	20	Hriscanka *	da	privatno	ne	ne	Nisam primila	ne	Nisam primila	b) verovatno da	d) ne verujem da mi je potrebna vakcina	e) ne smatram da su vakcine korisne	Zato sto su ljudi dobijali koronu i ako su vakcinisanj	Nista	Da ne uslovljavaju ljude	Ne
2022-03-10 15:55:17	ženski	23	Srpska	ne		ne	ne				d) definitivno ne	b) zabrinut/a sam zbog mogućih neželjenih dejstava vakcine	e) ne smatram da su vakcine korisne
2022-03-10 15:58:56	ženski	22	Srpkinja	da	državno	da	da		da
2022-03-10 15:59:23	ženski	22	Srpkinja	da	državno	ne	ne				b) verovatno da	d) ne verujem da mi je potrebna vakcina
2022-03-10 15:59:56	ženski	23	Srpkinja	da	državno	ne					d) definitivno ne	a) sačekao/la bih kako bih se uverio/la da je vakcina bezbedna, te je možda primim kasnije, b) zabrinut/a sam zbog mogućih neželjenih dejstava vakcine, c) smatram da je vakcina potrebnija drugima nego meni, d) ne verujem da mi je potrebna vakcina	e) ne smatram da su vakcine korisne	Postoje ljudi koji su preminuli od Covida19 iako su vakcinisani. Tako da ne vidim razlog zasto bi se ja vakcinisala.	Nista	Da ne bude politicki	/
2022-03-10 16:18:05	ženski	21	Srpska	da	državno	da	da		da	Radi putovanja.	a) definitivno da		a) smatram da ne pripadam rizičnoj grupi
2022-03-10 16:22:36	ženski	19	Srpkinja	da	državno	ne	ne	Nisam ni jednu	ne	/	d) definitivno ne	d) ne verujem da mi je potrebna vakcina	e) ne smatram da su vakcine korisne	Smatram da nema nikakvog efekta	Ništa	/	Ne
2022-03-10 16:24:46	ženski	24	Srpska	da	državno	da	da		da	Primila sam i trecu dozu jer smatram da je potrebna zapotpunu imunizaciju
2022-03-10 16:26:10	ženski	28	Srpska	ne		da	da		da		a) definitivno da
2022-03-10 16:26:53	ženski	23	Srpkinja	da	državno	da	da		da	Propusnica
2022-03-10 16:27:09	muški	32	србин	da	državno	da	da		da	Имунитет	a) definitivno da					Боља информисаност	Не
2022-03-10 16:28:21	ženski	46	Srpska	da	državno	da	da		da	Već sam primila u avgustu
2022-03-10 16:29:42	ženski	35	Rom	da	državno	da	da		ne
2022-03-10 16:30:19	ženski	28	Srpkinja	da	državno	da	da		da	Bolji imunitet
2022-03-10 16:34:27	ženski	26	Srpska	da	državno	ne					c) verovatno ne	b) zabrinut/a sam zbog mogućih neželjenih dejstava vakcine, d) ne verujem da mi je potrebna vakcina	c) već sam preležao virus KOVID-19, e) ne smatram da su vakcine korisne		Ništa.	Ispitivanje vakcina.
2022-03-10 16:36:31	ženski	39	Srbin	da	državno	da	da		ne				e) ne smatram da su vakcine korisne	I pored primljenih vakcina, ljudi su oboljevali od korone	Jedino, ako je vakcina sigurna zaštita od korona virusa	Nemam predloga	Ne
2022-03-10 16:36:38	ženski	22	Srpska	da	državno	ne					d) definitivno ne	b) zabrinut/a sam zbog mogućih neželjenih dejstava vakcine, d) ne verujem da mi je potrebna vakcina	c) već sam preležao virus KOVID-19, e) ne smatram da su vakcine korisne, f) ne verujem Kriznom štabu		Promena zdravstvenog sistema u Srbiji	Promena sistema
2022-03-10 16:40:05	ženski	21	Srpska	da	državno	ne					c) verovatno ne	b) zabrinut/a sam zbog mogućih neželjenih dejstava vakcine	c) već sam preležao virus KOVID-19, d) koristim maske i druga preventivna sredstva
2022-03-10 16:40:16	ženski	32	srpkinja	ne	državno	ne	ne	Nizam primila nijednu.	ne	Necu da primim.	d) definitivno ne	d) ne verujem da mi je potrebna vakcina	b) ne verujem da je virus KOVID-19 ozbiljna bolest, e) ne smatram da su vakcine korisne, f) ne verujem Kriznom štabu	Stete organizmu.	Ne menjam svoj stav.	Nemam ih.	Ne.
2022-03-10 16:41:16	muški	21	Srbin	da	privatno	ne	ne		ne		d) definitivno ne	Mislim da ne pomaze	e) ne smatram da su vakcine korisne	Razboljevaju se i umiru i vakcinisani🤷‍♂️
2022-03-10 16:43:22	ženski	23	Srpska	ne		da	da		ne
2022-03-10 16:43:24	ženski	32	Srpska	da	državno	ne	ne		ne		d) definitivno ne	Ne verujem u nesto sto nije ispitano.	e) ne smatram da su vakcine korisne, f) ne verujem Kriznom štabu		Dokaz o tome sta je zapravo cov19.
2022-03-10 16:50:22	ženski	45	Srpska	da	državno	ne					d) definitivno ne	b) zabrinut/a sam zbog mogućih neželjenih dejstava vakcine	c) već sam preležao virus KOVID-19
2022-03-10 16:51:02	ženski	32	Srpska	da	državno	da	ne	Kovid propusnica	ne		c) verovatno ne	a) sačekao/la bih kako bih se uverio/la da je vakcina bezbedna, te je možda primim kasnije	c) već sam preležao virus KOVID-19, d) koristim maske i druga preventivna sredstva
2022-03-10 16:51:40	ženski	32	Srpkinja	da	državno	ne	ne		ne		c) verovatno ne	d) ne verujem da mi je potrebna vakcina	a) smatram da ne pripadam rizičnoj grupi
2022-03-10 17:06:02	ženski	37	Srpkinja	da	državno	da	da		da	Vec sam je primila,smatram da treba poslusati strucne ljude u veci covida
2022-03-10 17:10:55	ženski	47	Srpska	da	državno	ne	ne		ne		d) definitivno ne	c) smatram da je vakcina potrebnija drugima nego meni	a) smatram da ne pripadam rizičnoj grupi
2022-03-10 17:25:01	ženski	34	Srpkinja	ne		ne					c) verovatno ne	d) ne verujem da mi je potrebna vakcina	c) već sam preležao virus KOVID-19	I'm
2022-03-10 17:25:47	ženski	37	Albanka	da	državno	da	da		ne	Nisam osećala dobro 6 meseci od obe vaksine
2022-03-10 17:39:09	ženski	21	Srpska	da	drugo						c) verovatno ne	a) sačekao/la bih kako bih se uverio/la da je vakcina bezbedna, te je možda primim kasnije	d) koristim maske i druga preventivna sredstva
2022-03-10 17:39:25	muški	21	Srbin	ne		ne	ne	/	ne	/	d) definitivno ne	d) ne verujem da mi je potrebna vakcina	b) ne verujem da je virus KOVID-19 ozbiljna bolest, d) koristim maske i druga preventivna sredstva, f) ne verujem Kriznom štabu	Smanjenje ljudske populacije na globalnom nivou, cilj je "zlatna milijarda". COVID-19 je virus stvoren u laboratoriji. Nije mutirao i ne siri se kako nam mediji i tzv. doktori/lekari/krizni stab nalazu. Za "virus" se zna kada ce biti aktivan a kada nece, cudno? ""Kafici rade do 20h, posle toga dolazi KORONA i juri nevakcinisane""	Ništa	/
2022-03-10 17:49:30	ženski	21	Srpska	da	državno	da	da		da	Razlozi za treću dozu vakcine (koju sam inače već primila) isti su kao i za prve dve - želim da zaštitim sebe od težih oblika virusa i da se obezbedim da postoji što manja šansa da drugima prenesem virus.					Nisam sigurna da bih promenila mišljenje jer vakcine protiv COVID-a rade na način na koji je namenjeno: ublažavaju teže oblike i simptome virusa.	Da se što više izbaci spoljna i unutrašnja politika iz priče o vakcinaciji - mnogi u vakcine ne veruju zbog toga što ne veruju u svoju vlast ni u one vlasti sa kojima njihova država sarađuje. Takođe, mislim da vlasti kod nas nisu adekvatno informisali građane o funkciji vakcine, pa mnogi sumnjaju u to šta ona radi i na koji način deluje.	Endru Vejkfild je najgora osoba.
2022-03-10 17:51:27	ženski	19	Srpkinja	da	državno	ne					d) definitivno ne	b) zabrinut/a sam zbog mogućih neželjenih dejstava vakcine	g) ne verujem u vakcine generalno	Postojala bi zastita od COVIDA,ne bi dolazilo do ponovnog zarazavanja....	Nista me ne ni navelo,ostajem pri svom stavu
2022-03-10 18:20:49	muški	27	Srbin	da	privatno	ne	ne				d) definitivno ne	Ne verujem medicini gde je umešana politika, uz medijsko nametanje vakcine kao jedinom leku, uz razne doze manipulacija (npr. dr Danica Grujičić i još par doktora tvrde da su njihova deca primila vakcinu a nemaju decu; prikazivanje mrtvačkih kovčega ispred bolnica u Bergamu zbog posledica Kovid-a a u stvari se radi o utpoljenim migrantima od pre nekoliko godina, ograđivanje naše države od negativ…	e) ne smatram da su vakcine korisne	Jednostavno se previše nameću i previše naglašavaju, država se ograđuje za negativne efekte a vakcinisani takođe mogu imati Kovid, prenositi Kovid, kao i preminuti od posledica Kovida. Jednostavno živimo u svetu u kome se akcenat stavlja na profit, ne bira se način da se obrne novac uz medijsko aminovanje širenja panike.	Neuračunljivost.	Nije problem u vakcini koliko u sveopštem manipulisanju informacijama i konstantnom prećutkivanju istine.	Nadam se da će se globalno manipulisanje zarad profita iskoreniti uz zdrav razum odnosno češćeg korišćenja logike bez paničenja.
2022-03-10 18:27:33	ženski	21	Srpska	da	državno	ne					c) verovatno ne	a) sačekao/la bih kako bih se uverio/la da je vakcina bezbedna, te je možda primim kasnije, d) ne verujem da mi je potrebna vakcina	a) smatram da ne pripadam rizičnoj grupi, d) koristim maske i druga preventivna sredstva, f) ne verujem Kriznom štabu		Ako bi se dokazalo da zaista ne ostavljaju posledice.	Iznošenje konkretnih i dokazanih informacija da vakcina stvarno pomaže.
2022-03-10 18:28:56	ženski	21	Srpkinja	da	državno	da	da		da	Lični. Vakcinu sam primila i primiću svojevoljno zbog sebe i meni bliskih osoba.
2022-03-10 18:31:54	ženski	19	Srpska	da	državno	ne	ne	Nisam primila	ne		d) definitivno ne	b) zabrinut/a sam zbog mogućih neželjenih dejstava vakcine	g) ne verujem u vakcine generalno	Verujem u vakcine koje su ispitane kao što su BSŽ, vakcina protiv dečije paralize i ostale , u vakcinu protiv Covid-a ne!	Da bude dovoljno ispitana	Dobro ispitati	Ne.
2022-03-10 18:32:48	ženski	38	Srpska	da	državno	da	da		ne
2022-03-10 18:45:58	ženski	20	Srpska	da	državno	ne	ne	/	ne	/	c) verovatno ne	b) zabrinut/a sam zbog mogućih neželjenih dejstava vakcine	c) već sam preležao virus KOVID-19	/	Ništa.	/	Ne.
2022-03-10 18:54:45	ženski	22	Srpska	da	državno	ne					c) verovatno ne	d) ne verujem da mi je potrebna vakcina	c) već sam preležao virus KOVID-19	Nisu dovoljno korisne jer da jesu ne bi se zarazavali i umirali i vakcinisani	Nista	Ne znam	Ne
2022-03-10 19:50:02	ženski	18	Srbija	da	državno	ne					d) definitivno ne	b) zabrinut/a sam zbog mogućih neželjenih dejstava vakcine	g) ne verujem u vakcine generalno	Zbog njenog delovanja i posledice koje ostavlja	Ništa		Ne
2022-03-10 19:59:39	ženski	45	Srpsko	da	državno	da	da		da	Ako bude obavezno za sve i ako me to sto nisam primila treću dozu bude ograničavalo
2022-03-10 20:42:31	muški	49	Srbin	da	državno	da	da		da	Primio
2022-03-10 21:24:55	ženski	20	Srpska	da	državno	da	da		ne	I sa 3. dozom vakcine moguće je zaraziti se kovidom 19
2022-03-10 22:55:42	muški	18	Srbin	da	državno	ne					d) definitivno ne	b) zabrinut/a sam zbog mogućih neželjenih dejstava vakcine	c) već sam preležao virus KOVID-19, d) koristim maske i druga preventivna sredstva		Ništa.	Nemam.	Ne.
2022-03-10 23:03:53	ženski	19	Srpkinja	da	državno	ne					d) definitivno ne	b) zabrinut/a sam zbog mogućih neželjenih dejstava vakcine	c) već sam preležao virus KOVID-19		Da bude dovoljno ispita	potvrdu proizvodjaca da je bezbedna i da se ne trazi dobrovoljan potpis.
2022-03-11 02:25:27	ženski	57	srpska	da	državno	ne					c) verovatno ne	d) ne verujem da mi je potrebna vakcina	Nije me ubedila struka	Verujem u vakcine,ali ovog puta nema dobrih argumenata	Da dobijem argumente zašto za I da nam daje zaštitu kao vakcine protiv drugih bolesti	Nisam razmisljala	Ne
2022-03-11 07:15:32	ženski	30	Srpska	da	državno	ne	ne	Nisam primila vakcinu	ne		c) verovatno ne	b) zabrinut/a sam zbog mogućih neželjenih dejstava vakcine	b) ne verujem da je virus KOVID-19 ozbiljna bolest	Smatram da se organizam sam bori sa tim "bezazlenim" virusima	Ozbiljnija klinička slika	Šta se dešava sa organizmom posle	Da se vakciniše onaj ko želi, bez "pretnji"
2022-03-11 09:10:01	ženski	19	Srpska	da	državno	da	da		ne
2022-03-11 09:10:06	ženski	19	Српска	da	državno	ne					d) definitivno ne	d) ne verujem da mi je potrebna vakcina	a) smatram da ne pripadam rizičnoj grupi
2022-03-11 09:10:11	muški	20	Srpska	da	državno	da	da		ne
2022-03-11 09:11:41	ženski	19	srpska	da	državno	da	da		da	zelim da budem sigurna od virusa
2022-03-11 09:11:47	ženski	19	Српска	da	državno	ne					b) verovatno da	a) sačekao/la bih kako bih se uverio/la da je vakcina bezbedna, te je možda primim kasnije	d) koristim maske i druga preventivna sredstva		Безбедност вакцине
2022-03-11 09:12:06	ženski	19	Srpska	da	državno	ne					d) definitivno ne	a) sačekao/la bih kako bih se uverio/la da je vakcina bezbedna, te je možda primim kasnije	a) smatram da ne pripadam rizičnoj grupi, f) ne verujem Kriznom štabu		Da se svest o vakcinaciji ne plasira putem medija već u obrazovnim ustanovama.	Izbegavati medije
2022-03-11 09:12:17	ženski	19	Srpska	da	drugo	ne					d) definitivno ne	b) zabrinut/a sam zbog mogućih neželjenih dejstava vakcine	g) ne verujem u vakcine generalno
2022-03-11 09:12:19	muški	19	Србин	da	državno	ne					d) definitivno ne	d) ne verujem da mi je potrebna vakcina	a) smatram da ne pripadam rizičnoj grupi, b) ne verujem da je virus KOVID-19 ozbiljna bolest, c) već sam preležao virus KOVID-19
2022-03-11 09:12:20	muški	19	Srbija	da	državno	ne	ne		ne		c) verovatno ne	d) ne verujem da mi je potrebna vakcina	a) smatram da ne pripadam rizičnoj grupi, d) koristim maske i druga preventivna sredstva				Ne
2022-03-11 09:12:25	ženski	19	Srpska	da	državno	ne	ne		ne		c) verovatno ne	d) ne verujem da mi je potrebna vakcina	c) već sam preležao virus KOVID-19		/	/	/
2022-03-11 09:12:35	ženski	19	srpska	da	državno	ne					c) verovatno ne	a) sačekao/la bih kako bih se uverio/la da je vakcina bezbedna, te je možda primim kasnije	a) smatram da ne pripadam rizičnoj grupi		Ništa	Nemam
2022-03-11 09:12:36	ženski	19	Srpska	da	državno	ne					c) verovatno ne	d) ne verujem da mi je potrebna vakcina	e) ne smatram da su vakcine korisne		Ništa	Nemam
2022-03-11 09:12:36	ženski	19	srpska	da	državno	ne					d) definitivno ne	a) sačekao/la bih kako bih se uverio/la da je vakcina bezbedna, te je možda primim kasnije	a) smatram da ne pripadam rizičnoj grupi		Nista	Nemam
2022-03-11 09:12:36	ženski	19	Srpsko	da	državno	ne	ne		ne		c) verovatno ne	b) zabrinut/a sam zbog mogućih neželjenih dejstava vakcine	c) već sam preležao virus KOVID-19
2022-03-11 09:12:39	ženski	20		da	državno	ne					c) verovatno ne	a) sačekao/la bih kako bih se uverio/la da je vakcina bezbedna, te je možda primim kasnije
2022-03-11 09:12:49	ženski	19	Srbin	da	državno	ne	ne		ne		c) verovatno ne	b) zabrinut/a sam zbog mogućih neželjenih dejstava vakcine	d) koristim maske i druga preventivna sredstva
2022-03-11 09:13:30	ženski	19	Srpska	da	državno	ne		/		/	c) verovatno ne	a) sačekao/la bih kako bih se uverio/la da je vakcina bezbedna, te je možda primim kasnije	d) koristim maske i druga preventivna sredstva	/	/	/	Ne
2022-03-11 09:13:55	muški	19	Srbin	da	državno	ne	ne		ne		c) verovatno ne	d) ne verujem da mi je potrebna vakcina	a) smatram da ne pripadam rizičnoj grupi		Ništa trenutno
2022-03-11 09:14:05	ženski	19	Srbija	da	državno	ne	ne		ne		b) verovatno da	d) ne verujem da mi je potrebna vakcina	b) ne verujem da je virus KOVID-19 ozbiljna bolest, e) ne smatram da su vakcine korisne, f) ne verujem Kriznom štabu		To da ljudi ne dobijaju kovid posle 2.doze
2022-03-11 09:14:15	ženski	19	Srpkinja	da	državno	ne					d) definitivno ne	b) zabrinut/a sam zbog mogućih neželjenih dejstava vakcine, c) smatram da je vakcina potrebnija drugima nego meni	c) već sam preležao virus KOVID-19, g) ne verujem u vakcine generalno	Svako ko je primio zarazio se tako da smatram da to nema nikakve veze tj. ne možemo ni verovati jer ne znamo sa čime nas vakcinišu	Ništa	/	Ne
2022-03-11 09:14:29	muški	19	Srbija	ne	drugo	ne	ne		ne		d) definitivno ne	d) ne verujem da mi je potrebna vakcina	a) smatram da ne pripadam rizičnoj grupi			Ako se nastavi rat u Ukrajini, to će biti dovoljno da se covid ugasi.
2022-03-11 09:15:07	ženski	19	Srpska	da	državno	ne			ne		d) definitivno ne	b) zabrinut/a sam zbog mogućih neželjenih dejstava vakcine	e) ne smatram da su vakcine korisne, g) ne verujem u vakcine generalno	Smatram da nisu bezbedne zato sto sam cula za dosta slucajeva koji su primili vakcinu pa posle kratkog vremena nisu preziveli. Jednostavno ne verujem u vakcine niti da one mogu da nam donesu nesto dobro.	Nista	Po meni vakcinacija nije potrebna
2022-03-11 09:16:02	ženski	20	Srpska	da	državno	ne					d) definitivno ne	d) ne verujem da mi je potrebna vakcina	c) već sam preležao virus KOVID-19, e) ne smatram da su vakcine korisne, f) ne verujem Kriznom štabu		Ništa	Nema ih	Ne
2022-03-11 09:16:48	ženski	19	srpkinja	da	državno	ne					d) definitivno ne	a) sačekao/la bih kako bih se uverio/la da je vakcina bezbedna, te je možda primim kasnije		Nedovoljno je ispitana, cak i ljudi koji su je primili nisu zasticeni	Misljenje bi mi promenilo kada bi vakcina zaista bila efikasna, dakle kada bi dovela do iskorenjivanja epidemije, a ne do "trenutne" zastite	Tim koji ima za cilj ono sto sam navela u prethodnom pitanju
2022-03-11 09:18:05	ženski	20	Српкска	da	državno	ne					d) definitivno ne	d) ne verujem da mi je potrebna vakcina	e) ne smatram da su vakcine korisne		Мислим да ме ништа не би навело на то да променим свој став, због свега што се дешава у свету. Генерално нисам противник вакцине, али не желим да примим било коју вакцину из разлога што нас сви условљавају са нечим и сматам да је то кршење људских права као што је то и у Уставу наведено.
2022-03-11 09:19:22	ženski	19	Srpsko	da	državno	ne					d) definitivno ne	a) sačekao/la bih kako bih se uverio/la da je vakcina bezbedna, te je možda primim kasnije, d) ne verujem da mi je potrebna vakcina	c) već sam preležao virus KOVID-19, d) koristim maske i druga preventivna sredstva, f) ne verujem Kriznom štabu		Da se vakcine detaljnije ispitaju i da se struka odluči za jednu vrstu vakcine, s' obzirom da su tokom pandemije vrlo često menjana mišljena koja je vakcina najbolja.	Jedna vrsta vakcine, detaljno ispitana sa dužim periodom dejstva.
2022-03-11 09:25:36	ženski	19	Српска	da	državno	ne					d) definitivno ne	d) ne verujem da mi je potrebna vakcina	e) ne smatram da su vakcine korisne		Променила бих мишљење када би вакцине против covid-19 биле стварно успешне и стварно некоме помогле
2022-03-11 09:25:46	muški	20	Srpska	da	državno	ne					c) verovatno ne	a) sačekao/la bih kako bih se uverio/la da je vakcina bezbedna, te je možda primim kasnije, b) zabrinut/a sam zbog mogućih neželjenih dejstava vakcine	a) smatram da ne pripadam rizičnoj grupi, f) ne verujem Kriznom štabu
2022-03-11 09:26:41	ženski	19	Srpkinja	da	državno	ne					c) verovatno ne	a) sačekao/la bih kako bih se uverio/la da je vakcina bezbedna, te je možda primim kasnije	a) smatram da ne pripadam rizičnoj grupi
2022-03-11 09:38:07	muški	20	Crnogorac	da	državno	da	da		da
2022-03-11 09:38:58	muški	20	Србин	da	državno	ne					d) definitivno ne	b) zabrinut/a sam zbog mogućih neželjenih dejstava vakcine, Постоји велики број докумената које су објавиле саме компаније задужене за развитак и производњу вакцина, да се дође до закључка да позитивне стране примања тренутних вакцина против ковид-19 нису веће од негативних.	c) već sam preležao virus KOVID-19, f) ne verujem Kriznom štabu, Не верујем компанијама, чија историја је пуна судских тужби и мита	Верујем у вакцине, али не у ковид-19 вакцине	За ковид-19, ништа
2022-03-11 09:40:00	ženski	20	Srpska	da	privatno	da	da		da	Zbog zaštite moje porodice od korona virusa
2022-03-11 09:40:52	ženski	19	Srpska	da	državno	da	da		da	Zaštita.
2022-03-11 09:41:06	ženski	19	Srpska	da	državno	da	da		ne
2022-03-11 09:46:29	ženski	19	Srpsko	da	državno	da	da		ne
2022-03-11 09:49:54	ženski	19	Srpska	da	državno	da	da	Dve	da	Zato što je tako predviđeno							Ne
2022-03-11 10:03:51	muški	19	Србин	da	državno	ne	ne		ne		d) definitivno ne	b) zabrinut/a sam zbog mogućih neželjenih dejstava vakcine, d) ne verujem da mi je potrebna vakcina	e) ne smatram da su vakcine korisne, f) ne verujem Kriznom štabu	Верујем да су вакцине корисне када се о вирусу зна довољно, не верујем у вакцине направљене после 2 месеца истраживања...	Вероватно ништа...	Укинути је...	Не...
2022-03-11 10:05:45	ženski	19	Srpkinja	da	državno	ne					d) definitivno ne	a) sačekao/la bih kako bih se uverio/la da je vakcina bezbedna, te je možda primim kasnije, b) zabrinut/a sam zbog mogućih neželjenih dejstava vakcine			Ništa
2022-03-11 10:19:26	ženski	19	Srpska	da	državno	da	da		da	Već sam je primila
2022-03-11 10:42:39	ženski	19	Srpska	da	državno	ne					c) verovatno ne	d) ne verujem da mi je potrebna vakcina	a) smatram da ne pripadam rizičnoj grupi, d) koristim maske i druga preventivna sredstva
2022-03-11 10:48:48	ženski	19	Srbin	da	državno	ne					c) verovatno ne	c) smatram da je vakcina potrebnija drugima nego meni	a) smatram da ne pripadam rizičnoj grupi
2022-03-11 10:52:33	ženski	19	Srpska	da	državno	ne	ne		ne		c) verovatno ne	d) ne verujem da mi je potrebna vakcina	b) ne verujem da je virus KOVID-19 ozbiljna bolest
2022-03-11 10:52:51	muški	19	Srbin	da	državno	da	da		ne	Ukinuli su kovid propusnice pa mi ne treba				Vakcine su dobre za starije ljude, rizicne gruope. Ja sam zdrav i prav	Nista	Jos 100e bi mi dobro doslo	Ne
2022-03-11 10:52:58	ženski	19	srpska	da	državno	ne					c) verovatno ne	a) sačekao/la bih kako bih se uverio/la da je vakcina bezbedna, te je možda primim kasnije	c) već sam preležao virus KOVID-19		da znam da je sigurno bezbedna
2022-03-11 10:53:35	ženski	19	srpska	da	državno	da	da		da
2022-03-11 10:58:40	muški	19	Srpska	da	državno	ne					d) definitivno ne	d) ne verujem da mi je potrebna vakcina	a) smatram da ne pripadam rizičnoj grupi
2022-03-11 10:59:57	muški	19	Srbin	da	državno	ne	ne	Nisam uošte primio vakcinu	ne	Nisam ni prve dve, ne znam kako bih treću	d) definitivno ne	a) sačekao/la bih kako bih se uverio/la da je vakcina bezbedna, te je možda primim kasnije, b) zabrinut/a sam zbog mogućih neželjenih dejstava vakcine	c) već sam preležao virus KOVID-19, e) ne smatram da su vakcine korisne, f) ne verujem Kriznom štabu	Nisu problem vakcine protiv ostalih bolesti, nego protiv ovog virusa za mene lično	Znam da vakcine nisu pouzdane jer znam za slučajeve da su ljudi umirali a da su bili vakcinisani, a osnovna definicija imunoglogije je da kad je neko vakcinisan ne može da oboli, a tek da umre	Da se objavi sastav vakcine	Ne
2022-03-11 11:02:08	ženski	19	srpska	da	državno	ne					d) definitivno ne	b) zabrinut/a sam zbog mogućih neželjenih dejstava vakcine, d) ne verujem da mi je potrebna vakcina	b) ne verujem da je virus KOVID-19 ozbiljna bolest, c) već sam preležao virus KOVID-19, f) ne verujem Kriznom štabu		nista
2022-03-11 11:04:35	ženski	19	Srpska	da	državno	da	da		ne
2022-03-11 11:04:41	ženski	19	Srpska	da	državno	ne					c) verovatno ne	a) sačekao/la bih kako bih se uverio/la da je vakcina bezbedna, te je možda primim kasnije, b) zabrinut/a sam zbog mogućih neželjenih dejstava vakcine
2022-03-11 11:06:59	ženski	43	Jugonostalgicar *	da	državno	da	da		da	Ptimila sam odmah.Vjerujem u vakcinaciju kao jednu od najvaznijih tekovina i dostignuca covjecanstva s tim da u ovom sada konkretnom slucaju vjerujem najvise u Fajzer vakcinu,u kineske ne! I naravno postujem preporuke i odluke SZO dok nas krizni stab uopste ne uvazavam jer su marionete u sluzbi politike vlasti koji se ne drze svojih stavova i stavova struke. Ako br antitjela se ne odrzava na dovo…						U Srbiji jedino novac moze pomoci inace vecina naroda je primitivna,zatucana narocito u unutrasnjosti i vjeruje u teorije zavjere tako da im nema pomoci.	Podrzavam obaveznu vakcinaciju iz vise razloga.
2022-03-11 11:24:43	muški	19	Srpska	da	državno	ne					c) verovatno ne	d) ne verujem da mi je potrebna vakcina	a) smatram da ne pripadam rizičnoj grupi	Nedovoljno dostupnih informacija o njihovom sastavu	Izlaganje i prihvatanje odgovornosti za bolest od strane farmako industrije kao i o slučajevima zataškavanja pri pronalaženju leka protiv nekih ozbiljnijih bolesti, samo bez laži i licemerja	Da se što manje politikuje i iznesu realna objektivna objašnjenja, ne samo to da pomaže već i nus pojave
2022-03-11 11:29:57	ženski	34	Srpkinja	da	privatno	ne			ne		d) definitivno ne	Moje pravo je da odlučim šta ću ubrizgati u svoje telo.	e) ne smatram da su vakcine korisne, f) ne verujem Kriznom štabu, g) ne verujem u vakcine generalno, Milion razloga još	Kada je dokazano pozitivno delovanje vakcine? Nikada 😉 Ljudi moji, ako potpisuješ da primaš na sopstvenu odgovornost onda ti ne treba vakcina no psiholog da ustanovi zašto stavljaš cev pištolja u usta dok ti je cev puške na glavi?? Malo pregrubo rečeno ali suština je pogođena...	Ništa... ako me ubije virus znači da mi je telo slabo, a ako je slabo onda mi i ne treba za dalje. Šalu na stranu, vakcina ne može da sacuva život ako je telo slabo. Može ishrana, trening i suplementacija. Narod potrčao poslednji put na krosu u osnovnoj, jede smeće iz meka, vitamini su im cigarete a minerali koka kola.	Ostaviti ljude na miru sa globalističkom propagandom i farmakomafijom	Ništa... besmisleno i bespotrebno stvaranje panike. Sada će tek biti psihičkih problema. Možda deluje naivno, ali poznajem bar 10 osoba koji više od dve godine nisu izašle iz kuće zbog straha. U početku mi je sve bilo smešno, ali više nije. Uz sve to neprestane sponzorisane objave "ako osećaš anksioznost idi po lek kod psihijatra" Nisam znala da se ljudi toliko plaše smrti. Nisam suicidna, ali kr…
2022-03-11 11:35:16	ženski	19	Srpsko	da	privatno	ne					c) verovatno ne	d) ne verujem da mi je potrebna vakcina	a) smatram da ne pripadam rizičnoj grupi		Nemogucnost napustanja drzave
2022-03-11 11:50:32	ženski	19	Srpska	da	državno	ne					d) definitivno ne	d) ne verujem da mi je potrebna vakcina	c) već sam preležao virus KOVID-19		Ništa
2022-03-11 11:53:27	muški	22	Srpska	da	državno	ne					d) definitivno ne	b) zabrinut/a sam zbog mogućih neželjenih dejstava vakcine
2022-03-11 11:54:31	ženski	20	srpska	da	državno	da	da		ne
2022-03-11 12:00:27	ženski	20	srpska	da	državno	ne	ne	Ne	ne	Nema potrebe na 1 dozu a ne na 3	d) definitivno ne	b) zabrinut/a sam zbog mogućih neželjenih dejstava vakcine, d) ne verujem da mi je potrebna vakcina	c) već sam preležao virus KOVID-19, f) ne verujem Kriznom štabu, g) ne verujem u vakcine generalno	Imala sam u porodici ljude sa neželjenim dejstvom vakcine….	Apsolutno ništa	Bez forsiranja na različite načine ,svako ima pravo na svoj izbor,niko nema pravo da odlučuje u nečije ime ili primorava nekoga na tako nešto,jedini koji ima pravo da odlučuje u naše ime smo mi sami,mislim da bi bilo nepotrebno navoditi ovakve razloge kada se već podrazumevaju…	Nema potrebe,glavne stavke su već navedene
2022-03-11 12:19:50	ženski	20	Srpska	da	državno	ne	ne				d) definitivno ne	b) zabrinut/a sam zbog mogućih neželjenih dejstava vakcine	c) već sam preležao virus KOVID-19		Nista
2022-03-11 12:20:04	ženski	19	Srpska	ne		ne					c) verovatno ne	b) zabrinut/a sam zbog mogućih neželjenih dejstava vakcine	d) koristim maske i druga preventivna sredstva		Da uvere ljude u to
2022-03-11 12:43:46	ženski	19	Srpkinja	da	drugo	da	da		ne
2022-03-11 12:44:23	muški	19	Srbin	da	državno	da	da		da	Produženo trajanje zaštite						Bolja edukacija stanovništva
2022-03-11 12:44:50	ženski	19	srpkinja	da	državno	ne	ne	/	ne	/	c) verovatno ne	a) sačekao/la bih kako bih se uverio/la da je vakcina bezbedna, te je možda primim kasnije		Nisam prelezala covid, tako da ne znam u sta bih trebala da verujem	Da prelezim covid, mozda	/	/
2022-03-11 12:45:21	ženski	19	Srpkinja	da	državno	ne					c) verovatno ne	a) sačekao/la bih kako bih se uverio/la da je vakcina bezbedna, te je možda primim kasnije			Bolja ispitanost same vakcine.
2022-03-11 12:47:48	muški	20	Srbin	da	državno	da	da		da								Smatram je izuzetno bitnim I neophodnim elementom opste zdravstvene zastite
2022-03-11 12:53:09	muški	18	Srbin	da	državno	ne					b) verovatno da	b) zabrinut/a sam zbog mogućih neželjenih dejstava vakcine
2022-03-11 13:09:10	ženski	19	Srpska	da	državno	ne	ne		ne		c) verovatno ne	b) zabrinut/a sam zbog mogućih neželjenih dejstava vakcine
2022-03-11 13:16:40	ženski	19	Srpkinja	ne		ne	ne		ne		d) definitivno ne	d) ne verujem da mi je potrebna vakcina	a) smatram da ne pripadam rizičnoj grupi, d) koristim maske i druga preventivna sredstva
2022-03-11 13:25:44	ženski	19	Srpsko	da	državno	da	da		ne	Smatram da su mi dovoljne dve doze.						Mislim da politika ne treba da se meša u zdravstvo, i da se vakcinise ko zeli, a ne da primoravaju na vakcinaciju.
2022-03-11 13:48:40	ženski	19	Srpska	da	državno	ne					d) definitivno ne	a) sačekao/la bih kako bih se uverio/la da je vakcina bezbedna, te je možda primim kasnije, c) smatram da je vakcina potrebnija drugima nego meni	c) već sam preležao virus KOVID-19, f) ne verujem Kriznom štabu	Ne verujem da su dovoljno ispitane, ljudi koji su imali kontra efekte	Kada vi dokazali da je 100% ispitana
2022-03-11 14:20:27	muški	19	Srbin	da	državno	da	da		da
2022-03-11 14:26:30	muški	20	Srbin	da	privatno	ne					d) definitivno ne	c) smatram da je vakcina potrebnija drugima nego meni, d) ne verujem da mi je potrebna vakcina	a) smatram da ne pripadam rizičnoj grupi, c) već sam preležao virus KOVID-19, d) koristim maske i druga preventivna sredstva
2022-03-11 14:28:54	muški	19	Srbin	da	državno	ne	ne		ne		d) definitivno ne	d) ne verujem da mi je potrebna vakcina	c) već sam preležao virus KOVID-19
2022-03-11 14:30:41	muški	20	Srpska	da	državno	ne	ne		ne		c) verovatno ne	d) ne verujem da mi je potrebna vakcina	a) smatram da ne pripadam rizičnoj grupi
2022-03-11 14:30:42	ženski	19	Srpska	da	državno	ne	ne		ne		c) verovatno ne	a) sačekao/la bih kako bih se uverio/la da je vakcina bezbedna, te je možda primim kasnije	c) već sam preležao virus KOVID-19
2022-03-11 14:31:38	ženski	19	Srpska	da	državno	ne					d) definitivno ne	d) ne verujem da mi je potrebna vakcina	e) ne smatram da su vakcine korisne
2022-03-11 14:36:54	ženski	20	Srbin	da	državno	ne	ne				d) definitivno ne	b) zabrinut/a sam zbog mogućih neželjenih dejstava vakcine	c) već sam preležao virus KOVID-19, e) ne smatram da su vakcine korisne, g) ne verujem u vakcine generalno	Smatram da nisu dovoljno testirane.	Ništa.
2022-03-11 15:27:25	ženski	51	Srpkinja	da	državno	da	da		da	Primila sam						Kvalitetnije i stručnije informisanje javnosti, a ne kroz spinovanje, zamenu teza i zastrašivanje	Nisam imala nikakve posebne nus pojave nakon sve tri doze. Primila sam kinesku vakcinu. I moje dete je vakcinisano.
2022-03-11 16:01:07	muški	19	Србин	ne		ne					d) definitivno ne	d) ne verujem da mi je potrebna vakcina	g) ne verujem u vakcine generalno
2022-03-11 16:43:01	ženski	19	Srpska	da	državno	ne	ne		ne		b) verovatno da	c) smatram da je vakcina potrebnija drugima nego meni	d) koristim maske i druga preventivna sredstva
2022-03-11 18:14:18	muški	20	Srpska	da	državno	da	da		da	Da bio bio potpuno zaštićen od virusa					Nepristrasnost u davanju informacija i saveta za vakcinaciju	Davanje nepristrasnih informacija o vakcini i podsticanje stanovništva na vakcinaciju
2022-03-11 18:59:46	muški	20	Србин	da	privatno	ne					c) verovatno ne	a) sačekao/la bih kako bih se uverio/la da je vakcina bezbedna, te je možda primim kasnije		Верујем у вакцинацију генерално и сматрам да је максимално корисна.	Када је конкретно у питању COVID19, ништа. Вакцинисаћу се уколико епидемија настави да хара због имунитета крда, премда мени лично вакцина није потребна (прележао двапут Ковид без последица). Када су у питању вируси генерално, поготово они који су далеко смртоноснији, вакцинација је апсолутно нужна.	Далеко више информација од тренутно понуђених, али и поштовање одлуке да поједини једноставно не желе да се вакцинишу, без икаквих уцена и кршења људских права.	Не.
2022-03-11 19:39:43	muški	19	Srbin	ne		ne			ne		c) verovatno ne	b) zabrinut/a sam zbog mogućih neželjenih dejstava vakcine	e) ne smatram da su vakcine korisne		Neizbežna prinuda, svojevoljno nikad	Da se svaki gradjanin čuva za sebe, i da se pridrzava mera i vakciniše ukoliko misli da je to dobro za njega. Kovid propusnice treba ukloniti jer nije logicno da virus napada samo posle 8.
2022-03-11 20:09:12	ženski	19	Srpska	da	državno	ne	ne		ne		c) verovatno ne	a) sačekao/la bih kako bih se uverio/la da je vakcina bezbedna, te je možda primim kasnije	a) smatram da ne pripadam rizičnoj grupi, b) ne verujem da je virus KOVID-19 ozbiljna bolest, c) već sam preležao virus KOVID-19, f) ne verujem Kriznom štabu		Da vidim da je nekome ta vakcina ustvari pomogla, jer je dosta njih imalo ista iskustva, nekad cak i gora, posle vakcine u kontaktu sa kovidom.	Da nas vise priblize o informacijama same vakcine. Mislim da su "sankcije" koje su uvedene, kao sto je skraceno radno vreme usluznih objekata, totalno nebulozne u besmislene.
2022-03-11 20:43:52	ženski	20	Srbija	da	državno	ne	ne		ne		d) definitivno ne	b) zabrinut/a sam zbog mogućih neželjenih dejstava vakcine	b) ne verujem da je virus KOVID-19 ozbiljna bolest, c) već sam preležao virus KOVID-19
2022-03-11 21:00:32	ženski	35	Srpska	da	državno	da	da		da	Podsticanje imunoloskog odgovora u borbi protiv virusa
2022-03-11 21:03:03	ženski	19	Srpska	da	državno	da	da		ne
2022-03-11 21:57:59	ženski	32	Srpkinja	da	državno	da	da		ne				a) smatram da ne pripadam rizičnoj grupi, d) koristim maske i druga preventivna sredstva, f) ne verujem Kriznom štabu
2022-03-12 09:49:06	muški	34	Srbin	da	državno	da	da		da	Zdravstvena bezbednost i poverenje u nauku						Sira edukacija, posebno stanovnistva u manjim sredinama	Primio sam i trecu dozu odavno :-)
2022-03-12 10:30:28	muški	19	Srbin	da	državno	da	da		da	Da bih se zaštitio.							Ne
2022-03-12 11:02:09	muški	34	srpska	ne		da	da		da	booster						da vakcina ne bude besplatna i da je ne bude u dovoljnoj kolicini za sve
2022-03-12 14:42:27	ženski	28	Srpkinja	da	državno	ne			ne		d) definitivno ne	Ne želim da je primim uz potpis da je primam “na sopstvenu odgovornost”, već na odgovornost proizvodjača i lekara koji garantuju za njena dejstva.		Primamo je na “sopstvenu odgovornost”, pokazala su se brojna neželjena dejstva, nedovoljno ispitana, zašto svako dobija svoj kod i kako ja kao laik da znam koja je najbolja za mene i moj organizam obzirom da imamo širi izbor.	Sada već apsolutno ništa.	Kada je u pitanju vakcinisanje protiv kovida - nemam ih.	Volela bih da saznam (na osnovu rezultata ankete) koji procenat stanovništva se vakcinisao jer veruje u dejstvo vakcine, koji zbog nemogućnosti izlaska u grad i putovanja, a koji je procenat onih koji su primili vakcinu jer su bili prinudjeni zbog posla, pa eto neko pitanje vezano za razlog vakcinacije.
2022-03-12 22:14:02	muški	63	Srbin	da	državno	da	da		da	Sigurnost i završetak procesa zastite						Zadovoljan sam sa onim šta se radi u Srbiji
2022-03-13 16:20:29	muški	40	Srbin	da	državno	da	da		da	Primio i trecu dozu
2022-03-13 19:22:30	ženski	43	Srpkinja	da	državno	da	da		da	Vec sam primila, zbog putovanja i zastite, ali izgleda da nema neke narocite svrhe, ne priznaju sve zemlje sinofarm a i pored tri doze sam imala kovid
2022-03-13 23:01:45	muški	29	Srbin	da	privatno	ne	ne		ne		c) verovatno ne	a) sačekao/la bih kako bih se uverio/la da je vakcina bezbedna, te je možda primim kasnije, b) zabrinut/a sam zbog mogućih neželjenih dejstava vakcine, d) ne verujem da mi je potrebna vakcina	a) smatram da ne pripadam rizičnoj grupi, c) već sam preležao virus KOVID-19, d) koristim maske i druga preventivna sredstva, e) ne smatram da su vakcine korisne, f) ne verujem Kriznom štabu	Nisu dovoljno proverene.	Ozbiljna drzava.
2022-03-19 11:13:51	muški	47	Србин	da	državno	da	da		da	препоруке надлежних здравствених органа.
2022-03-19 11:14:02	ženski	41	Srpkinja	da	državno	da	da
2022-03-19 14:45:33	ženski	39	Srpsko	da	državno	da	da		da	Kao i za predhodne dve,zastita od komplikacija koje izaziva sam virus.			c) već sam preležao virus KOVID-19		Jasniji stav medicine(javnog zdravlja) uopste po pitanju imunizacije u vezi Covida-19.	Samo iednoglasan stav medicine	Ne
2022-03-19 14:49:37	muški	41	Srpska	da	državno	da	da		da	Zastita
2022-03-19 22:17:01	ženski	36		da	državno	da	da		da	Već sam primila sve tri doze.						Manje agresivan pristup, više razumljive edukacije, približene pacijentu a ne lekaru.
2022-03-19 22:57:18	ženski	27	srpkinja	da	državno	da	da		ne
2022-03-19 23:23:17	ženski	49	Srpska	da	državno	ne	ne		ne		c) verovatno ne	b) zabrinut/a sam zbog mogućih neželjenih dejstava vakcine	c) već sam preležao virus KOVID-19
2022-03-20 20:17:26	ženski	71	srpska	da	državno	da	da		da	Zbog dodatne zastite					Nista, verujem u vakcinu	Dodatna edukacija o znacaju vakcinacije	/
2022-03-20 21:21:18	muški	45	Srbin	da	državno	da	da		da	Primio trecu dozu					Stavovi struke	Uvodjenje benefita za vakcinisane osiguranike zdravtvenog osiguranja	Ne
2022-03-20 21:29:00	ženski	32	Srpkinja	da	državno	da	da		ne
